# Supplementary material for: Dicer-Dependent Biogenesis of Small RNAs Derived from 7SL RNA
Source: PLoS One. 2012 Jul 12;7(7):e40705. doi: 10.1371/journal.pone.0040705 (PMC3395682; doi:10.1371/journal.pone.0040705)
Supplement: Table S2 — 7SL RNA-derived small RNAs. (XLS) [file pone.0040705.s006.xls]

## Sheet: Sheet1
sRNA Id in con sample	Count	Sequence	Length	Strand, positive(+) or negative(-)	The start site on 7SL RNA
t0067819	9	GCCGGGCGCGGTGGCGCGTGCCTGTAG	27	+	1
t0085198	7	GCCGGGCGCGGTGGCGCGTGCCTGTAGTC	29	+	1
t0118686	5	GCCGGGCGCGGTGGCGCGTGCCTGTAGT	28	+	1
t0133091	4	GCCGGGCGCGGTGGCGCGTG	20	+	1
t0197639	3	GCCGGGCGCGGTGGCGCGTGC	21	+	1
t0287316	2	GCCGGGCGCGGTGGCGCGTGCCTGTAGTCC	30	+	1
t1126389	1	GCCGGGCGCGGTGGCGCGTGCCTG	24	+	1
t0800773	1	CCGGGCGCGGTGGCGCGTG	19	+	2
t1398423	1	CGGGCGCGGTGGCGCGTGC	19	+	3
t0268268	2	GCGCGGTGGCGCGTGCCTGTAG	22	+	6
t0148850	4	CGCGGTGGCGCGTGCCTGTAGT	22	+	7
t0246647	2	CGCGGTGGCGCGTGCCTGTAGTCCCAG	27	+	7
t0369830	2	CGCGGTGGCGCGTGCCTGTAGTCCC	25	+	7
t0944384	1	CGCGGTGGCGCGTGCCTGTAG	21	+	7
t0063737	10	GCGGTGGCGCGTGCCTGTAG	20	+	8
t0068690	9	GCGGTGGCGCGTGCCTGTAGT	21	+	8
t0084131	7	GCGGTGGCGCGTGCCTGTAGTCCC	24	+	8
t0117111	5	GCGGTGGCGCGTGCCTGTAGTCC	23	+	8
t0226129	2	GCGGTGGCGCGTGCCTGTAGTCCCA	25	+	8
t0276968	2	GCGGTGGCGCGTGCCTGTAGTC	22	+	8
t0435231	1	GCGGTGGCGCGTGCCTGTAGTCCCAG	26	+	8
t1409233	1	GCGGTGGCGCGTGCCTGTAGTCCCAGC	27	+	8
t0001979	490	CGGTGGCGCGTGCCTGTAGTCCC	23	+	9
t0012107	68	CGGTGGCGCGTGCCTGTAGTCC	22	+	9
t0014974	54	CGGTGGCGCGTGCCTGTAGTC	21	+	9
t0018374	43	CGGTGGCGCGTGCCTGTAG	19	+	9
t0021314	36	CGGTGGCGCGTGCCTGTAGTCCCAG	25	+	9
t0034177	21	CGGTGGCGCGTGCCTGTAGTCCCAGC	26	+	9
t0037407	19	CGGTGGCGCGTGCCTGTAGTCCCA	24	+	9
t0039999	17	CGGTGGCGCGTGCCTGTAGT	20	+	9
t1084974	1	CGGTGGCGCGTGCCTGTA	18	+	9
t1256958	1	CGGTGGCGCGTGCCTGTAGTCCCAGCTA	28	+	9
t0006201	144	GGTGGCGCGTGCCTGTAGTCCC	22	+	10
t0029110	25	GGTGGCGCGTGCCTGTAGTC	20	+	10
t0034989	20	GGTGGCGCGTGCCTGTAGTCC	21	+	10
t0035362	20	GGTGGCGCGTGCCTGTAGTCCCAGC	25	+	10
t0045912	15	GGTGGCGCGTGCCTGTAGTCCCAG	24	+	10
t0069605	9	GGTGGCGCGTGCCTGTAGT	19	+	10
t0745086	1	GGTGGCGCGTGCCTGTAGTCCCA	23	+	10
t1101746	1	GGTGGCGCGTGCCTGTAGTCCCAGCTA	27	+	10
t0024341	31	GTGGCGCGTGCCTGTAGTCCC	21	+	11
t0042935	16	GTGGCGCGTGCCTGTAGTCC	20	+	11
t0052273	13	GTGGCGCGTGCCTGTAGTC	19	+	11
t0053416	12	GTGGCGCGTGCCTGTAGTCCCAG	23	+	11
t0068066	9	GTGGCGCGTGCCTGTAGTCCCAGC	24	+	11
t0142130	4	GTGGCGCGTGCCTGTAGTCCCA	22	+	11
t1311568	1	GTGGCGCGTGCCTGTAGT	18	+	11
t0033414	21	GCGCGTGCCTGTAGTCCC	18	+	14
t0190998	3	GCGCGTGCCTGTAGTCCCA	19	+	14
t0261105	2	GCGCGTGCCTGTAGTCCCAGC	21	+	14
t0296565	2	GCGCGTGCCTGTAGTCCCAGCTAC	24	+	14
t0396265	1	GCGCGTGCCTGTAGTCCCAGCTACTCGGGA	30	+	14
t0588402	1	GCGCGTGCCTGTAGTCCCAGCTACTCGGG	29	+	14
t0618664	1	GCGCGTGCCTGTAGTCCCAGCT	22	+	14
t0949186	1	GCGCGTGCCTGTAGTCCCAGCTACTCGG	28	+	14
t0044481	15	CGCGTGCCTGTAGTCCCAG	19	+	15
t0145356	4	CGCGTGCCTGTAGTCCCAGCT	21	+	15
t0153032	4	CGCGTGCCTGTAGTCCCAGCTAC	23	+	15
t0187189	3	CGCGTGCCTGTAGTCCCAGCTACTCGGG	28	+	15
t0189059	3	CGCGTGCCTGTAGTCCCAGCTACTC	25	+	15
t0353864	2	CGCGTGCCTGTAGTCCCA	18	+	15
t0711247	1	CGCGTGCCTGTAGTCCCAGC	20	+	15
t1388552	1	CGCGTGCCTGTAGTCCCAGC	20	-	15
t0084286	7	GCGTGCCTGTAGTCCCAGCTACTC	24	+	16
t0112329	5	GCGTGCCTGTAGTCCCAG	18	+	16
t0123784	5	GCGTGCCTGTAGTCCCAGCTACTCGGG	27	+	16
t0178807	3	GCGTGCCTGTAGTCCCAGCTACTCGGGA	28	+	16
t1010772	1	GCGTGCCTGTAGTCCCAGCTA	21	+	16
t1136041	1	GCGTGCCTGTAGTCCCAGC	19	+	16
t1219358	1	GCGTGCCTGTAGTCCCAGCTAC	22	+	16
t0014590	55	CGTGCCTGTAGTCCCAGCTACTCGGG	26	+	17
t0104954	6	CGTGCCTGTAGTCCCAGCTACTCGGGA	27	+	17
t0116268	5	CGTGCCTGTAGTCCCAGCTACTCGG	25	+	17
t0126795	4	CGTGCCTGTAGTCCCAGCTACTC	23	+	17
t0181994	3	CGTGCCTGTAGTCCCAGCTACT	22	+	17
t0198623	3	CGTGCCTGTAGTCCCAGCTAC	21	+	17
t0268394	2	CGTGCCTGTAGTCCCAGCTA	20	+	17
t0347110	2	CGTGCCTGTAGTCCCAGC	18	+	17
t0975605	1	CGTGCCTGTAGTCCCAGCT	19	+	17
t1226159	1	CGTGCCTGTAGTCCCAGCTACTCGGGAGG	29	+	17
t0514369	1	GTGCCTGTAGTCCCAGCTA	19	+	18
t1028505	1	GTGCCTGTAGTCCCAGCTACTCGGGA	26	+	18
t1046267	1	GTGCCTGTAGTCCCAGCTACTCGGGAGGC	29	+	18
t1107794	1	GTGCCTGTAGTCCCAGCTACTCGGG	25	+	18
t1280718	1	GTGCCTGTAGTCCCAGCTACTC	22	+	18
t1359907	1	GTGCCTGTAGTCCCAGCT	18	+	18
t0248671	2	TGCCTGTAGTCCCAGCTACTCGGG	24	+	19
t0368547	2	TGCCTGTAGTCCCAGCTACTCGGGA	25	+	19
t1028519	1	TGCCTGTAGTCCCAGCTACT	20	+	19
t1335658	1	TGCCTGTAGTCCCAGCTACTCGG	23	+	19
t0239652	2	GCCTGTAGTCCCAGCTACTCGGG	23	+	20
t0254750	2	GCCTGTAGTCCCAGCTACTCGGGAGGCTG	29	+	20
t0737120	1	GCCTGTAGTCCCAGCTACTC	20	+	20
t1225093	1	GCCTGTAGTCCCAGCTACTCGGGAGGC	27	+	20
t0004144	226	CCTGTAGTCCCAGCTACTCGGGAGGCTG	28	+	21
t0018959	41	CCTGTAGTCCCAGCTACTCGGG	22	+	21
t0078666	8	CCTGTAGTCCCAGCTACTCGG	21	+	21
t0091332	7	CCTGTAGTCCCAGCTACTCGGGA	23	+	21
t0099178	6	CCTGTAGTCCCAGCTACTCGGGAGGCTGA	29	+	21
t0794114	1	CCTGTAGTCCCAGCTACTCGG	21	-	21
t1082546	1	CCTGTAGTCCCAGCTACTCG	20	+	21
t1141292	1	CCTGTAGTCCCAGCTACTCGGGAGGCT	27	+	21
t1335673	1	CCTGTAGTCCCAGCTACTC	19	+	21
t1399285	1	CCTGTAGTCCCAGCTACTCG	20	-	21
t0001604	623	CTGTAGTCCCAGCTACTCGGGAGGCTG	27	+	22
t0063028	10	CTGTAGTCCCAGCTACTCGGGAGGCTGA	28	+	22
t0064679	10	CTGTAGTCCCAGCTACTCGGG	21	+	22
t0103640	6	CTGTAGTCCCAGCTACTCGGGAGGCTGAG	29	+	22
t0181897	3	CTGTAGTCCCAGCTACTCGG	20	+	22
t0216581	2	CTGTAGTCCCAGCTACTCGGGAGGCT	26	+	22
t0271482	2	CTGTAGTCCCAGCTACTCGGGAGG	24	+	22
t0588608	1	CTGTAGTCCCAGCTACTCGGGAGGC	25	+	22
t0002096	462	TGTAGTCCCAGCTACTCGGGAGGCTG	26	+	23
t0048048	14	TGTAGTCCCAGCTACTCGGGAGGCTGA	27	+	23
t0090276	7	TGTAGTCCCAGCTACTCGGG	20	+	23
t0119320	5	TGTAGTCCCAGCTACTCGG	19	+	23
t0209117	3	TGTAGTCCCAGCTACTCGGGAGGCTGAG	28	+	23
t0247696	2	TGTAGTCCCAGCTACTCGGGA	21	+	23
t0361683	2	TGTAGTCCCAGCTACTCGGGAGG	23	+	23
t0854402	1	TGTAGTCCCAGCTACTCGGGAGGCTGAGG	29	+	23
t1065745	1	TGTAGTCCCAGCTACTCGGGAGGCT	25	+	23
t1330148	1	TGTAGTCCCAGCTACTCG	18	+	23
t0118312	5	GTAGTCCCAGCTACTCGGGAGGCTG	25	+	24
t0533462	1	GTAGTCCCAGCTACTCGGG	19	+	24
t0903456	1	TAGTCCCAGCTACTCGGGAG	20	-	25
t0495979	1	GTCCCAGCTACTCGGGAGGCTGAG	24	+	27
t1408073	1	TCCCAGCTACTCGGGAGGCTGAGG	24	+	28
t0193232	3	CCCAGCTACTCGGGAGGCTGA	21	-	29
t1051135	1	CCCAGCTACTCGGGAGGCTGAGG	23	+	29
t0964757	1	CCAGCTACTCGGGAGGCTGAGG	22	+	30
t1376264	1	CCAGCTACTCGGGAGGCTGAG	21	-	30
t0258870	2	CAGCTACTCGGGAGGCTGAG	20	+	31
t0346658	2	CAGCTACTCGGGAGGCTGAGGC	22	+	31
t0868365	1	CAGCTACTCGGGAGGCTGAGG	21	+	31
t0042629	16	AGCTACTCGGGAGGCTGAGG	20	+	32
t0070058	9	AGCTACTCGGGAGGCTGAGGCTGGAG	26	+	32
t0085958	7	AGCTACTCGGGAGGCTGAGGC	21	+	32
t0114764	5	AGCTACTCGGGAGGCTGAG	19	+	32
t0241024	2	AGCTACTCGGGAGGCTGAGGCTGG	24	+	32
t0401571	1	AGCTACTCGGGAGGCTGA	18	+	32
t1102080	1	AGCTACTCGGGAGGCTGAGGCTG	23	+	32
t1360235	1	AGCTACTCGGGAGGCTGAGGCTGGAGG	27	+	32
t0043734	16	GCTACTCGGGAGGCTGAGG	19	+	33
t0100364	6	GCTACTCGGGAGGCTGAGGCTGG	23	+	33
t0103239	6	GCTACTCGGGAGGCTGAG	18	+	33
t0104227	6	GCTACTCGGGAGGCTGAGGCTGGAG	25	+	33
t0105130	6	GCTACTCGGGAGGCTGAGGC	20	+	33
t0121362	5	GCTACTCGGGAGGCTGAGGCTGGAGG	26	+	33
t0195206	3	GCTACTCGGGAGGCTGAGGCTGGA	24	+	33
t0612204	1	GCTACTCGGGAGGCTGAGGCTG	22	+	33
t0742213	1	GCTACTCGGGAGGCTGAGGCTGGAGGAT	28	+	33
t0880150	1	GCTACTCGGGAGGCTGAGGCTGGAGGA	27	+	33
t0035154	20	CTACTCGGGAGGCTGAGGCTGGAG	24	+	34
t0044005	16	CTACTCGGGAGGCTGAGG	18	+	34
t0052551	13	CTACTCGGGAGGCTGAGGCTGGAGGA	26	+	34
t0060293	11	CTACTCGGGAGGCTGAGGCTGGAGG	25	+	34
t0174411	3	CTACTCGGGAGGCTGAGGC	19	+	34
t0303110	2	CTACTCGGGAGGCTGAGGCTGGAGGAT	27	+	34
t0322473	2	CTACTCGGGAGGCTGAGGCTGGA	23	+	34
t0463145	1	CTACTCGGGAGGCTGAGGCTG	21	+	34
t1115183	1	CTACTCGGGAGGCTGAGGCTGGAGGATC	28	+	34
t1195355	1	CTACTCGGGAGGCTGAGGCTGG	22	+	34
t0148528	4	TACTCGGGAGGCTGAGGCTGGAG	23	+	35
t0169240	3	TACTCGGGAGGCTGAGGC	18	+	35
t0696294	1	TACTCGGGAGGCTGAGGCTG	20	+	35
t1309835	1	TACTCGGGAGGCTGAGGCTGGAGGA	25	+	35
t0074247	8	ACTCGGGAGGCTGAGGCTGGAG	22	+	36
t0138983	4	ACTCGGGAGGCTGAGGCTGGAGG	23	+	36
t0146076	4	ACTCGGGAGGCTGAGGCTGGAGGATCG	27	+	36
t0176327	3	ACTCGGGAGGCTGAGGCTGGAGGAT	25	+	36
t0353602	2	ACTCGGGAGGCTGAGGCTGGAGGA	24	+	36
t0788913	1	ACTCGGGAGGCTGAGGCTG	19	+	36
t0026365	28	CTCGGGAGGCTGAGGCTGGAGGATCG	26	+	37
t0031819	23	CTCGGGAGGCTGAGGCTGGAG	21	+	37
t0051301	13	CTCGGGAGGCTGAGGCTGGAGG	22	+	37
t0054366	12	CTCGGGAGGCTGAGGCTGGAGGATC	25	+	37
t0059266	11	CTCGGGAGGCTGAGGCTGGAGGAT	24	+	37
t0060570	11	CTCGGGAGGCTGAGGCTGGAGGATCGCT	28	+	37
t0069363	9	CTCGGGAGGCTGAGGCTGGAGGA	23	+	37
t0131759	4	CTCGGGAGGCTGAGGCTGG	19	+	37
t0179448	3	CTCGGGAGGCTGAGGCTGGA	20	+	37
t0552476	1	CTCGGGAGGCTGAGGCTGGAGGATCGC	27	+	37
t0222201	2	TCGGGAGGCTGAGGCTGGAG	20	+	38
t0277873	2	TCGGGAGGCTGAGGCTGGAGGATCGC	26	+	38
t0173326	3	CGGGAGGCTGAGGCTGGAGGATCG	24	+	39
t0203321	3	CGGGAGGCTGAGGCTGGAGGAT	22	+	39
t0376329	1	CGGGAGGCTGAGGCTGGAGGA	21	+	39
t0831612	1	CGGGAGGCTGAGGCTGGAGGATCGCT	26	+	39
t0914020	1	CGGGAGGCTGAGGCTGGAGGATCGC	25	+	39
t1041609	1	CGGGAGGCTGAGGCTGGAGG	20	+	39
t1297689	1	CGGGAGGCTGAGGCTGGAGGATC	23	+	39
t0079120	8	GGGAGGCTGAGGCTGGAGGAT	21	+	40
t0102083	6	GGGAGGCTGAGGCTGGAGGATCG	23	+	40
t0261233	2	GGGAGGCTGAGGCTGGAGGA	20	+	40
t0400582	1	GGGAGGCTGAGGCTGGAGGATCGCT	25	+	40
t0482765	1	GGGAGGCTGAGGCTGGAG	18	+	40
t0536343	1	GGGAGGCTGAGGCTGGAGGATCGCTT	26	+	40
t0812350	1	GGGAGGCTGAGGCTGGAGG	19	+	40
t0920509	1	GGGAGGCTGAGGCTGGAGGATC	22	+	40
t0156813	4	GGAGGCTGAGGCTGGAGGATC	21	+	41
t0528040	1	GGAGGCTGAGGCTGGAGGAT	20	+	41
t0856582	1	GGAGGCTGAGGCTGGAGGATCG	22	+	41
t0693646	1	GAGGCTGAGGCTGGAGGATC	20	+	42
t0696808	1	GAGGCTGAGGCTGGAGGATCGCTT	24	+	42
t1221062	1	GAGGCTGAGGCTGGAGGAT	19	+	42
t1278203	1	GAGGCTGAGGCTGGAGGATCG	21	+	42
t1325640	1	GAGGCTGAGGCTGGAGGATCGCTTGA	26	+	42
t0002639	368	AGGCTGAGGCTGGAGGATCGCT	22	+	43
t0012859	64	AGGCTGAGGCTGGAGGATCGCTT	23	+	43
t0015157	53	AGGCTGAGGCTGGAGGATCGC	21	+	43
t0029799	25	AGGCTGAGGCTGGAGGATCG	20	+	43
t0038855	18	AGGCTGAGGCTGGAGGATC	19	+	43
t0110624	5	AGGCTGAGGCTGGAGGATCGCTTGAGTCC	29	+	43
t0111566	5	AGGCTGAGGCTGGAGGATCGCTTGA	25	+	43
t0140514	4	AGGCTGAGGCTGGAGGATCGCTTG	24	+	43
t0171909	3	AGGCTGAGGCTGGAGGATCGCTTGAGTC	28	+	43
t0254661	2	AGGCTGAGGCTGGAGGAT	18	+	43
t1106329	1	AGGCTGAGGCTGGAGGATCGCTTGAGTCCA	30	+	43
t0010485	80	GGCTGAGGCTGGAGGATCGCT	21	+	44
t0011618	71	GGCTGAGGCTGGAGGATCG	19	+	44
t0023492	32	GGCTGAGGCTGGAGGATCGCTT	22	+	44
t0026926	28	GGCTGAGGCTGGAGGATCGC	20	+	44
t0046270	15	GGCTGAGGCTGGAGGATCGCTTGAGTCC	28	+	44
t0049526	14	GGCTGAGGCTGGAGGATC	18	+	44
t0061271	11	GGCTGAGGCTGGAGGATCGCTTGAGTC	27	+	44
t0064269	10	GGCTGAGGCTGGAGGATCGCTTGA	24	+	44
t0287204	2	GGCTGAGGCTGGAGGATCGCTTG	23	+	44
t0547980	1	GGCTGAGGCTGGAGGATCGCTTGAGTCCAG	30	+	44
t0026464	28	GCTGAGGCTGGAGGATCGCTTGAGTCC	27	+	45
t0043307	16	GCTGAGGCTGGAGGATCGCTTG	22	+	45
t0051275	13	GCTGAGGCTGGAGGATCGCT	20	+	45
t0062932	10	GCTGAGGCTGGAGGATCG	18	+	45
t0065095	10	GCTGAGGCTGGAGGATCGC	19	+	45
t0083921	7	GCTGAGGCTGGAGGATCGCTTGA	23	+	45
t0104478	6	GCTGAGGCTGGAGGATCGCTT	21	+	45
t0429206	1	GCTGAGGCTGGAGGATCGCTTGAGT	25	+	45
t1288140	1	GCTGAGGCTGGAGGATCGCTTGAGTCCAG	29	+	45
t1356951	1	GCTGAGGCTGGAGGATCGCTTGAGTC	26	+	45
t0022292	34	CTGAGGCTGGAGGATCGCTTGAGTCC	26	+	46
t0095828	6	CTGAGGCTGGAGGATCGCTTG	21	+	46
t0097704	6	CTGAGGCTGGAGGATCGCT	19	+	46
t0219662	2	CTGAGGCTGGAGGATCGCTTGAGTCCA	27	+	46
t0231570	2	CTGAGGCTGGAGGATCGC	18	+	46
t0236063	2	CTGAGGCTGGAGGATCGCTT	20	+	46
t0340547	2	CTGAGGCTGGAGGATCGCTTGA	22	+	46
t0763083	1	CTGAGGCTGGAGGATCGCTTGAGT	24	+	46
t0863067	1	CTGAGGCTGGAGGATCGCTTGAGTC	25	+	46
t0089416	7	TGAGGCTGGAGGATCGCTTG	20	+	47
t0107463	5	TGAGGCTGGAGGATCGCTTGAGTCC	25	+	47
t0154456	4	TGAGGCTGGAGGATCGCTTGA	21	+	47
t0286515	2	TGAGGCTGGAGGATCGCTTGAG	22	+	47
t0349981	2	TGAGGCTGGAGGATCGCTTGAGTCCA	26	+	47
t0575011	1	TGAGGCTGGAGGATCGCTTGAGTCCAG	27	+	47
t0761535	1	TGAGGCTGGAGGATCGCT	18	+	47
t1194072	1	TGAGGCTGGAGGATCGCTTGAGT	23	+	47
t0030807	24	GAGGCTGGAGGATCGCTTG	19	+	48
t0092030	7	GAGGCTGGAGGATCGCTTGAGTCC	24	+	48
t0330352	2	GAGGCTGGAGGATCGCTTGAGTC	23	+	48
t0359144	2	GAGGCTGGAGGATCGCTTGAGTCCA	25	+	48
t1130800	1	GAGGCTGGAGGATCGCTT	18	+	48
t1344437	1	GAGGCTGGAGGATCGCTTGA	20	+	48
t0001747	566	AGGCTGGAGGATCGCTTGAGTCC	23	+	49
t0005076	179	AGGCTGGAGGATCGCTTGA	19	+	49
t0006157	145	AGGCTGGAGGATCGCTTG	18	+	49
t0007665	114	AGGCTGGAGGATCGCTTGAGTCCAGG	26	+	49
t0009736	87	AGGCTGGAGGATCGCTTGAGTC	22	+	49
t0014486	56	AGGCTGGAGGATCGCTTGAG	20	+	49
t0022374	34	AGGCTGGAGGATCGCTTGAGTCCA	24	+	49
t0026708	28	AGGCTGGAGGATCGCTTGAGT	21	+	49
t0028704	26	AGGCTGGAGGATCGCTTGAGTCCAG	25	+	49
t0340334	2	AGGCTGGAGGATCGCTTGAGTCCAGGA	27	+	49
t0112922	5	GGCTGGAGGATCGCTTGAGTCC	22	+	50
t0735499	1	GGCTGGAGGATCGCTTGAGTCCA	23	+	50
t0890230	1	GGCTGGAGGATCGCTTGA	18	+	50
t0997357	1	GGCTGGAGGATCGCTTGAGTCCAGG	25	+	50
t0139211	4	GCTGGAGGATCGCTTGAGTCCAGG	24	+	51
t0312697	2	GCTGGAGGATCGCTTGAGTC	20	+	51
t1026470	1	GCTGGAGGATCGCTTGAG	18	+	51
t0014164	57	CTGGAGGATCGCTTGAGTCCAGG	23	+	52
t0189671	3	CTGGAGGATCGCTTGAGTCC	20	+	52
t0329047	2	CTGGAGGATCGCTTGAGTCCAGGAG	25	+	52
t1192404	1	CTGGAGGATCGCTTGAGTCCAGGA	24	+	52
t0170394	3	TGGAGGATCGCTTGAGTCCAGG	22	+	53
t1012719	1	TGGAGGATCGCTTGAGTCC	19	+	53
t0104786	6	GGAGGATCGCTTGAGTCCAGG	21	+	54
t0241239	2	GGAGGATCGCTTGAGTCCAG	20	+	54
t0385366	1	GGAGGATCGCTTGAGTCC	18	+	54
t0020693	37	GAGGATCGCTTGAGTCCAGG	20	+	55
t0319043	2	GAGGATCGCTTGAGTCCAGGAGTTCTGG	28	+	55
t0357945	2	GAGGATCGCTTGAGTCCAGGAGTTC	25	+	55
t0359235	2	GAGGATCGCTTGAGTCCAG	19	+	55
t1253335	1	GAGGATCGCTTGAGTCCAGGAGTTCTG	27	+	55
t0047725	14	AGGATCGCTTGAGTCCAGG	19	+	56
t0777633	1	AGGATCGCTTGAGTCCAG	18	+	56
t1390361	1	AGGATCGCTTGAGTCCAGGAGTT	23	+	56
t1118950	1	GGATCGCTTGAGTCCAGGAGTTCTG	25	+	57
t0794368	1	TCGCTTGAGTCCAGGAGT	18	-	60
t1078605	1	GCTTGAGTCCAGGAGTTCTGGGCTGTAG	28	+	62
t0467001	1	CTTGAGTCCAGGAGTTCTGGGCTGTAGTG	29	+	63
t0039443	18	TGAGTCCAGGAGTTCTGGGCTGTAGTGCGC	30	+	65
t0139076	4	TGAGTCCAGGAGTTCTGGGCTGTAGTG	27	+	65
t0749787	1	TGAGTCCAGGAGTTCTGGGCTGTAG	25	+	65
t0848955	1	TGAGTCCAGGAGTTCTGGGCTGTAGTGCG	29	+	65
t0885759	1	TGAGTCCAGGAGTTCTGGGCTGTAGTGC	28	+	65
t0066070	10	GAGTCCAGGAGTTCTGGGCTGTAGTGCGC	29	+	66
t0085735	7	GAGTCCAGGAGTTCTGGGCTGTAGTG	26	+	66
t0091219	7	GAGTCCAGGAGTTCTGGGCTGTAGTGCGCT	30	+	66
t0194951	3	GAGTCCAGGAGTTCTGGGCTGTAGTGC	27	+	66
t0368129	2	GAGTCCAGGAGTTCTGGGCTGTAGTGCG	28	+	66
t0138438	4	AGTCCAGGAGTTCTGGGCTGTAGTGCG	27	+	67
t0181132	3	AGTCCAGGAGTTCTGGGCTGTAGTGCGCT	29	+	67
t0188470	3	AGTCCAGGAGTTCTGGGCTGTAGTGCGC	28	+	67
t0282270	2	AGTCCAGGAGTTCTGGGCTGTAGTGC	26	+	67
t0554459	1	AGTCCAGGAGTTCTGGGCTGTAGTG	25	+	67
t0919763	1	AGTCCAGGAGTTCTGGGCTGTAGT	24	+	67
t0933908	1	GTCCAGGAGTTCTGGGCTGTAGTGCGC	27	+	68
t0221294	2	TCCAGGAGTTCTGGGCTGTAGTGCGCTA	28	+	69
t0070707	9	CCAGGAGTTCTGGGCTGTAGTG	22	+	70
t0124356	5	CCAGGAGTTCTGGGCTGTAG	20	+	70
t0536351	1	CCAGGAGTTCTGGGCTGTAGTGCGCTA	27	+	70
t0041999	16	CAGGAGTTCTGGGCTGTAGTG	21	+	71
t0084928	7	CAGGAGTTCTGGGCTGTAG	19	+	71
t0125534	5	CAGGAGTTCTGGGCTGTA	18	+	71
t0125908	5	CAGGAGTTCTGGGCTGTAGTGCGCTAT	27	+	71
t0185567	3	CAGGAGTTCTGGGCTGTAGTGCGCTA	26	+	71
t0226066	2	CAGGAGTTCTGGGCTGTAGT	20	+	71
t0275110	2	CAGGAGTTCTGGGCTGTAGTGCG	23	+	71
t1171647	1	CAGGAGTTCTGGGCTGTAGTGCGC	24	+	71
t0000248	4659	AGGAGTTCTGGGCTGTAGTGCGCTA	25	+	72
t0000624	1670	AGGAGTTCTGGGCTGTAGTGCGCT	24	+	72
t0001960	495	AGGAGTTCTGGGCTGTAGTG	20	+	72
t0003537	268	AGGAGTTCTGGGCTGTAGTGCGCTAT	26	+	72
t0004866	189	AGGAGTTCTGGGCTGTAGTGCG	22	+	72
t0004995	183	AGGAGTTCTGGGCTGTAGTGCGCTATG	27	+	72
t0005697	157	AGGAGTTCTGGGCTGTAG	18	+	72
t0008323	104	AGGAGTTCTGGGCTGTAGTGCGC	23	+	72
t0013582	60	AGGAGTTCTGGGCTGTAGT	19	+	72
t0020783	37	AGGAGTTCTGGGCTGTAGTGC	21	+	72
t0000114	11423	GGAGTTCTGGGCTGTAGTGCGCTA	24	+	73
t0000239	4810	GGAGTTCTGGGCTGTAGTGCGCT	23	+	73
t0000409	2664	GGAGTTCTGGGCTGTAGTGCGCTATG	26	+	73
t0000428	2532	GGAGTTCTGGGCTGTAGTG	19	+	73
t0002239	432	GGAGTTCTGGGCTGTAGTGCGCTAT	25	+	73
t0002862	337	GGAGTTCTGGGCTGTAGTGCG	21	+	73
t0004298	217	GGAGTTCTGGGCTGTAGTGCGC	22	+	73
t0010492	80	GGAGTTCTGGGCTGTAGT	18	+	73
t0015479	52	GGAGTTCTGGGCTGTAGTGCGCTATGC	27	+	73
t0027825	26	GGAGTTCTGGGCTGTAGTGC	20	+	73
t0119650	5	GGAGTTCTGGGCTGTAGTGCGCTATGCCG	29	+	73
t0332071	2	GGAGTTCTGGGCTGTAGTGCGCTATGCC	28	+	73
t0000006	166928	GAGTTCTGGGCTGTAGTGCGCTA	23	+	74
t0000029	51493	GAGTTCTGGGCTGTAGTGCGCT	22	+	74
t0000042	31802	GAGTTCTGGGCTGTAGTGCGCTATG	25	+	74
t0000067	18421	GAGTTCTGGGCTGTAGTG	18	+	74
t0000178	7070	GAGTTCTGGGCTGTAGTGCGCTAT	24	+	74
t0000628	1659	GAGTTCTGGGCTGTAGTGCG	20	+	74
t0000679	1507	GAGTTCTGGGCTGTAGTGCGC	21	+	74
t0009685	88	GAGTTCTGGGCTGTAGTGC	19	+	74
t0010099	84	GAGTTCTGGGCTGTAGTGCGCTATGC	26	+	74
t0012685	65	GAGTTCTGGGCTGTAGTGCGCTATGCCG	28	+	74
t0063019	10	GAGTTCTGGGCTGTAGTGCGCTATGCCGA	29	+	74
t0081228	8	GAGTTCTGGGCTGTAGTGCGCTATGCC	27	+	74
t0000038	33917	AGTTCTGGGCTGTAGTGCGCTATG	24	+	75
t0000040	32448	AGTTCTGGGCTGTAGTGCGCTA	22	+	75
t0000084	14693	AGTTCTGGGCTGTAGTGCGCT	21	+	75
t0000396	2766	AGTTCTGGGCTGTAGTGCGC	20	+	75
t0000789	1287	AGTTCTGGGCTGTAGTGCG	19	+	75
t0001175	860	AGTTCTGGGCTGTAGTGCGCTAT	23	+	75
t0004834	191	AGTTCTGGGCTGTAGTGC	18	+	75
t0005843	153	AGTTCTGGGCTGTAGTGCGCTATGC	25	+	75
t0021749	35	AGTTCTGGGCTGTAGTGCGCTATGCCG	27	+	75
t0039600	18	AGTTCTGGGCTGTAGTGCGCTATGCCGA	28	+	75
t0068442	9	AGTTCTGGGCTGTAGTGCGCTATGCC	26	+	75
t0001080	939	GTTCTGGGCTGTAGTGCGCTA	21	+	76
t0002173	443	GTTCTGGGCTGTAGTGCGCT	20	+	76
t0003878	242	GTTCTGGGCTGTAGTGCGCTATG	23	+	76
t0006101	146	GTTCTGGGCTGTAGTGCGC	19	+	76
t0009743	87	GTTCTGGGCTGTAGTGCG	18	+	76
t0015245	53	GTTCTGGGCTGTAGTGCGCTAT	22	+	76
t0098719	6	GTTCTGGGCTGTAGTGCGCTATGC	24	+	76
t0220113	2	GTTCTGGGCTGTAGTGCGCTATGCCG	26	+	76
t0002955	325	TTCTGGGCTGTAGTGCGCT	19	+	77
t0003062	313	TTCTGGGCTGTAGTGCGCTA	20	+	77
t0003372	280	TTCTGGGCTGTAGTGCGCTATG	22	+	77
t0014552	55	TTCTGGGCTGTAGTGCGC	18	+	77
t0021561	36	TTCTGGGCTGTAGTGCGCTAT	21	+	77
t0037689	19	TTCTGGGCTGTAGTGCGCTATGC	23	+	77
t0779422	1	TTCTGGGCTGTAGTGCGCTATGCC	24	+	77
t0986528	1	TTCTGGGCTGTAGTGCGCTATGCCG	25	+	77
t1105963	1	TTCTGGGCTGTAGTGCGCTATGCCGA	26	+	77
t0009378	91	TCTGGGCTGTAGTGCGCTATG	21	+	78
t0010073	84	TCTGGGCTGTAGTGCGCTA	19	+	78
t0017929	44	TCTGGGCTGTAGTGCGCT	18	+	78
t0043587	16	TCTGGGCTGTAGTGCGCTAT	20	+	78
t0073296	9	TCTGGGCTGTAGTGCGCTATGC	22	+	78
t0032219	22	CTGGGCTGTAGTGCGCTATG	20	+	79
t0035727	20	CTGGGCTGTAGTGCGCTA	18	+	79
t0128410	4	CTGGGCTGTAGTGCGCTAT	19	+	79
t0141888	4	CTGGGCTGTAGTGCGCTATGC	21	+	79
t0037669	19	TGGGCTGTAGTGCGCTATG	19	+	80
t0048619	14	TGGGCTGTAGTGCGCTATGC	20	+	80
t0201945	3	TGGGCTGTAGTGCGCTATGCC	21	+	80
t0495299	1	TGGGCTGTAGTGCGCTATGCCGA	23	+	80
t0514503	1	TGGGCTGTAGTGCGCTATGCCGATCGG	27	+	80
t1190012	1	TGGGCTGTAGTGCGCTAT	18	+	80
t0173895	3	GGGCTGTAGTGCGCTATGCCGATCGGG	27	+	81
t0201366	3	GGGCTGTAGTGCGCTATG	18	+	81
t1047621	1	GGGCTGTAGTGCGCTATGCCGATCGG	26	+	81
t0919028	1	GCTGTAGTGCGCTATGCCGATCG	23	+	83
t1054675	1	GTAGTGCGCTATGCCGATCGGG	22	+	86
t0478554	1	TAGTGCGCTATGCCGATCGGGTGT	24	+	87
t1024155	1	TAGTGCGCTATGCCGATCGG	20	+	87
t0191435	3	AGTGCGCTATGCCGATCGGGTG	22	+	88
t0309865	2	AGTGCGCTATGCCGATCGG	19	+	88
t0751674	1	AGTGCGCTATGCCGATCGGG	20	+	88
t0062417	10	GTGCGCTATGCCGATCGGG	19	+	89
t0121564	5	GTGCGCTATGCCGATCGGGTGTCCGC	26	+	89
t0140018	4	GTGCGCTATGCCGATCGGGTG	21	+	89
t1000470	1	GTGCGCTATGCCGATCGG	18	+	89
t0153340	4	TGCGCTATGCCGATCGGGTGT	21	+	90
t0232137	2	TGCGCTATGCCGATCGGGTG	20	+	90
t0337446	2	TGCGCTATGCCGATCGGGTGTCCGC	25	+	90
t1202645	1	TGCGCTATGCCGATCGGG	18	+	90
t1222003	1	TGCGCTATGCCGATCGGGTGTCCG	24	+	90
t0036328	19	CGCTATGCCGATCGGGTGTCCG	22	+	92
t0041108	17	CGCTATGCCGATCGGGTGTCCGC	23	+	92
t0133125	4	CGCTATGCCGATCGGGTGT	19	+	92
t0160267	3	CGCTATGCCGATCGGGTGTCCGCA	24	+	92
t0202406	3	CGCTATGCCGATCGGGTGTC	20	+	92
t1210903	1	CGCTATGCCGATCGGGTG	18	+	92
t1244597	1	CGCTATGCCGATCGGGTGTCC	21	+	92
t0850314	1	GCTATGCCGATCGGGTGTCC	20	+	93
t1015597	1	GCTATGCCGATCGGGTGT	18	+	93
t1221665	1	GCTATGCCGATCGGGTGTCCG	21	+	93
t0060160	11	CTATGCCGATCGGGTGTCCGC	21	+	94
t0064602	10	CTATGCCGATCGGGTGTCCG	20	+	94
t0187255	3	CTATGCCGATCGGGTGTCCGCACTA	25	+	94
t1009257	1	CTATGCCGATCGGGTGTC	18	+	94
t0120142	5	TATGCCGATCGGGTGTCCGC	20	+	95
t0002702	359	ATGCCGATCGGGTGTCCGC	19	+	96
t0028173	26	ATGCCGATCGGGTGTCCG	18	+	96
t0072156	9	ATGCCGATCGGGTGTCCGCA	20	+	96
t0166245	3	ATGCCGATCGGGTGTCCGCACTA	23	+	96
t0170189	3	ATGCCGATCGGGTGTCCGCACT	22	+	96
t0012146	68	TGCCGATCGGGTGTCCGC	18	+	97
t0029216	25	TGCCGATCGGGTGTCCGCACTAAGTTCGGC	30	+	97
t0037823	19	TGCCGATCGGGTGTCCGCA	19	+	97
t0045323	15	TGCCGATCGGGTGTCCGCACTA	22	+	97
t0069259	9	TGCCGATCGGGTGTCCGCAC	20	+	97
t0107934	5	TGCCGATCGGGTGTCCGCACT	21	+	97
t0114212	5	TGCCGATCGGGTGTCCGCACTAAGTT	26	+	97
t0351351	2	TGCCGATCGGGTGTCCGCACTAAGT	25	+	97
t0357419	2	TGCCGATCGGGTGTCCGCACTAAGTTCG	28	+	97
t1156494	1	TGCCGATCGGGTGTCCGCACTAAGTTC	27	+	97
t0205251	3	GCCGATCGGGTGTCCGCACTAAGTTCGGC	29	+	98
t0497556	1	GCCGATCGGGTGTCCGCACTAAGTTCGG	28	+	98
t0532113	1	GCCGATCGGGTGTCCGCACT	20	+	98
t1044595	1	GCCGATCGGGTGTCCGCA	18	+	98
t0026125	29	CCGATCGGGTGTCCGCACTAAGTTCGGC	28	+	99
t0035086	20	CCGATCGGGTGTCCGCACTA	20	+	99
t0076579	8	CCGATCGGGTGTCCGCACTAAGTTC	25	+	99
t0089982	7	CCGATCGGGTGTCCGCACT	19	+	99
t0116556	5	CCGATCGGGTGTCCGCACTAAGTTCGG	27	+	99
t0167753	3	CCGATCGGGTGTCCGCACTAAGTTCGGCA	29	+	99
t0263593	2	CCGATCGGGTGTCCGCACTAAGTT	24	+	99
t0300302	2	CCGATCGGGTGTCCGCAC	18	+	99
t0316890	2	CCGATCGGGTGTCCGCACTAAGT	23	+	99
t0110657	5	CGATCGGGTGTCCGCACTAAGTTCGGC	27	+	100
t0327556	2	CGATCGGGTGTCCGCACTAAGTT	23	+	100
t0353860	2	CGATCGGGTGTCCGCACTAAGTTCGGCAT	29	+	100
t0379040	1	CGATCGGGTGTCCGCACTAAGTTCGGCA	28	+	100
t0381243	1	CGATCGGGTGTCCGCACTA	19	+	100
t0503030	1	CGATCGGGTGTCCGCACTAAGTTC	24	+	100
t1272746	1	CGATCGGGTGTCCGCACTAAGTTCG	25	+	100
t0261058	2	GATCGGGTGTCCGCACTAAGTT	22	+	101
t0317049	2	GATCGGGTGTCCGCACTAAGTTCGGC	26	+	101
t0039315	18	ATCGGGTGTCCGCACTAAGTTCGGCAT	27	+	102
t0110805	5	ATCGGGTGTCCGCACTAAGTTCGGC	25	+	102
t0116040	5	ATCGGGTGTCCGCACTAAGTTCGGCA	26	+	102
t0335608	2	ATCGGGTGTCCGCACTAAGTTCG	23	+	102
t0785534	1	ATCGGGTGTCCGCACTAAGT	20	+	102
t0158730	3	TCGGGTGTCCGCACTAAGTTCGG	23	+	103
t1357295	1	TCGGGTGTCCGCACTAAGTTCG	22	+	103
t1010137	1	CGGGTGTCCGCACTAAGTTCGGCAT	25	+	104
t1037103	1	CGGGTGTCCGCACTAAGTTCGG	22	+	104
t1168078	1	CGGGTGTCCGCACTAAGTTCGGC	23	+	104
t1263162	1	GGGTGTCCGCACTAAGTT	18	+	105
t1269918	1	GGGTGTCCGCACTAAGTTCGGCAT	24	+	105
t0856874	1	GGTGTCCGCACTAAGTTCGG	20	+	106
t1024916	1	GGTGTCCGCACTAAGTTCGGC	21	+	106
t0198278	3	GTGTCCGCACTAAGTTCGG	19	+	107
t0643325	1	CGCACTAAGTTCGGCATCAATATG	24	+	112
t1317655	1	CGCACTAAGTTCGGCATCA	19	+	112
t0044538	15	CACTAAGTTCGGCATCAATATGG	23	+	114
t0056790	12	CACTAAGTTCGGCATCAAT	19	+	114
t0061704	10	CACTAAGTTCGGCATCAATAT	21	+	114
t0076800	8	CACTAAGTTCGGCATCAA	18	+	114
t0094758	6	CACTAAGTTCGGCATCAATATG	22	+	114
t0112552	5	CACTAAGTTCGGCATCAATATGGT	24	+	114
t0170639	3	CACTAAGTTCGGCATCAATATGGTGA	26	+	114
t0188548	3	CACTAAGTTCGGCATCAATA	20	+	114
t0396181	1	CACTAAGTTCGGCATCAATATGGTG	25	+	114
t0261665	2	ACTAAGTTCGGCATCAATATG	21	+	115
t0319419	2	ACTAAGTTCGGCATCAATA	19	+	115
t0335056	2	ACTAAGTTCGGCATCAAT	18	+	115
t0338818	2	ACTAAGTTCGGCATCAATAT	20	+	115
t0463182	1	ACTAAGTTCGGCATCAATATGGTGA	25	+	115
t0829738	1	ACTAAGTTCGGCATCAATATGGT	23	+	115
t0885217	1	ACTAAGTTCGGCATCAATATGG	22	+	115
t1118505	1	ACTAAGTTCGGCATCAATATGGTG	24	+	115
t0082048	7	CTAAGTTCGGCATCAATATGG	21	+	116
t0160196	3	CTAAGTTCGGCATCAATAT	19	+	116
t0180346	3	CTAAGTTCGGCATCAATA	18	+	116
t0204611	3	CTAAGTTCGGCATCAATATGGTGA	24	+	116
t0727506	1	CTAAGTTCGGCATCAATATGGTGACCTC	28	+	116
t1214110	1	CTAAGTTCGGCATCAATATGGT	22	+	116
t0094490	6	TAAGTTCGGCATCAATATG	19	+	117
t0101505	6	TAAGTTCGGCATCAATATGG	20	+	117
t0209647	3	TAAGTTCGGCATCAATATGGTG	22	+	117
t0221530	2	TAAGTTCGGCATCAATATGGT	21	+	117
t0358943	2	TAAGTTCGGCATCAATATGGTGA	23	+	117
t0458408	1	TAAGTTCGGCATCAATATGGTGACCTCC	28	+	117
t0535422	1	TAAGTTCGGCATCAATAT	18	+	117
t0189357	3	AAGTTCGGCATCAATATG	18	+	118
t0367961	2	AAGTTCGGCATCAATATGGTGA	22	+	118
t0524495	1	AAGTTCGGCATCAATATGGT	20	+	118
t0817634	1	AAGTTCGGCATCAATATGGTG	21	+	118
t0935953	1	AAGTTCGGCATCAATATGGTGACCTCC	27	+	118
t0242735	2	AGTTCGGCATCAATATGGTG	20	+	119
t0740491	1	AGTTCGGCATCAATATGGTGA	21	+	119
t1086399	1	AGTTCGGCATCAATATGG	18	+	119
t0834460	1	TTCGGCATCAATATGGTGA	19	+	121
t0209956	3	CATCAATATGGTGACCTCCCGGGAGCGG	28	+	126
t0078306	8	ATCAATATGGTGACCTCCCGGGAGCGG	27	+	127
t0192392	3	ATCAATATGGTGACCTCC	18	+	127
t1159701	1	ATCAATATGGTGACCTCCCGGGAGCG	26	+	127
t1243198	1	ATCAATATGGTGACCTCCCGGGAGCGGGG	29	+	127
t0236503	2	TCAATATGGTGACCTCCCGGGAGCGGG	27	+	128
t0066729	10	CAATATGGTGACCTCCCGGGAGCGG	25	+	129
t0085274	7	CAATATGGTGACCTCCCGGGAGCGGG	26	+	129
t0188262	3	CAATATGGTGACCTCCCGGGAGCGGGGGA	29	+	129
t0261562	2	CAATATGGTGACCTCCCGGGAGCGGGGG	28	+	129
t0310333	2	CAATATGGTGACCTCCCGGGAGCGGGG	27	+	129
t1037182	1	CAATATGGTGACCTCCCGG	19	+	129
t1237360	1	CAATATGGTGACCTCCCGGGAGCG	24	+	129
t0028453	26	AATATGGTGACCTCCCGGGAGCGG	24	+	130
t0057916	11	AATATGGTGACCTCCCGGGAGCGGG	25	+	130
t0154600	4	AATATGGTGACCTCCCGGGAGCGGGG	26	+	130
t0180881	3	AATATGGTGACCTCCCGGGAGCGGGGGAC	29	+	130
t0259250	2	AATATGGTGACCTCCCGGGAGCGGGGGA	28	+	130
t1277906	1	AATATGGTGACCTCCCGGGAGCGGGGG	27	+	130
t1336967	1	AATATGGTGACCTCCCGGGAGCG	23	+	130
t0105334	6	ATATGGTGACCTCCCGGGAGCGG	23	+	131
t0192441	3	ATATGGTGACCTCCCGGGAGCGGGG	25	+	131
t0252119	2	ATATGGTGACCTCCCGGGAGCGGG	24	+	131
t0691089	1	ATATGGTGACCTCCCGGGAGCGGGGGA	27	+	131
t1284920	1	ATATGGTGACCTCCCGGGAGCGGGGGACC	29	+	131
t1342590	1	ATATGGTGACCTCCCGGGAGCGGGGG	26	+	131
t0057714	11	TATGGTGACCTCCCGGGAGCGG	22	+	132
t0111674	5	TATGGTGACCTCCCGGGAGCGGG	23	+	132
t0376393	1	TATGGTGACCTCCCGGGAGCG	21	+	132
t0115273	5	ATGGTGACCTCCCGGGAGCGG	21	+	133
t0773621	1	ATGGTGACCTCCCGGGAGCGGGGGACCACC	30	+	133
t0857515	1	ATGGTGACCTCCCGGGAGCGGGGGAC	26	+	133
t1080639	1	ATGGTGACCTCCCGGGAGCGGG	22	+	133
t0042028	16	TGGTGACCTCCCGGGAGCGG	20	+	134
t0485180	1	TGGTGACCTCCCGGGAGCGGGGGAC	25	+	134
t0733467	1	TGGTGACCTCCCGGGAGCGGGG	22	+	134
t1011523	1	TGGTGACCTCCCGGGAGCG	19	+	134
t0075438	8	GGTGACCTCCCGGGAGCGG	19	+	135
t0108139	5	GGTGACCTCCCGGGAGCGGG	20	+	135
t0607532	1	GGTGACCTCCCGGGAGCGGGGGA	23	+	135
t0153686	4	GTGACCTCCCGGGAGCGGG	19	+	136
t0231822	2	GTGACCTCCCGGGAGCGGGGGA	22	+	136
t0272641	2	GTGACCTCCCGGGAGCGGGGGACC	24	+	136
t1056337	1	GTGACCTCCCGGGAGCGGGGGACCAC	26	+	136
t0637547	1	TCCCGGGAGCGGGGGACCACCAGGTTG	27	+	142
t0037081	19	CCGGGAGCGGGGGACCACCAG	21	+	144
t0091002	7	CCGGGAGCGGGGGACCAC	18	+	144
t0091375	7	CCGGGAGCGGGGGACCACCAGGTTG	25	+	144
t0138369	4	CCGGGAGCGGGGGACCACCA	20	+	144
t0171890	3	CCGGGAGCGGGGGACCACC	19	+	144
t0224586	2	CCGGGAGCGGGGGACCACCAGGT	23	+	144
t0693135	1	CCGGGAGCGGGGGACCACCAGGTT	24	+	144
t0004738	196	CGGGAGCGGGGGACCACCAGGTTG	24	+	145
t0007612	115	CGGGAGCGGGGGACCACCAG	20	+	145
t0015801	51	CGGGAGCGGGGGACCACC	18	+	145
t0018248	43	CGGGAGCGGGGGACCACCAGG	21	+	145
t0030045	24	CGGGAGCGGGGGACCACCA	19	+	145
t0211251	3	CGGGAGCGGGGGACCACCAGGT	22	+	145
t0324387	2	CGGGAGCGGGGGACCACCAGGTT	23	+	145
t0578938	1	CGGGAGCGGGGGACCACCAGGTTGCCT	27	+	145
t0990649	1	CGGGAGCGGGGGACCACCAGGTTGCCTA	28	+	145
t0072385	9	GGGAGCGGGGGACCACCAGGTTG	23	+	146
t0107909	5	GGGAGCGGGGGACCACCAG	19	+	146
t0320379	2	GGGAGCGGGGGACCACCAGG	20	+	146
t0360416	2	GGGAGCGGGGGACCACCA	18	+	146
t0538999	1	GGGAGCGGGGGACCACCAGGTTGC	24	+	146
t0602292	1	AGCGGGGGACCACCAGGTT	19	+	149
t0042639	16	GGGACCACCAGGTTGCCTAAGGAGG	25	+	154
t0248065	2	GGGACCACCAGGTTGCCTAAGGAG	24	+	154
t0827029	1	CCACCAGGTTGCCTAAGG	18	+	158
t0525544	1	ACCAGGTTGCCTAAGGAGGGGTGAACCGGC	30	+	160
t0677148	1	ACCAGGTTGCCTAAGGAGGGGTGAACCGG	29	+	160
t1163083	1	ACCAGGTTGCCTAAGGAGGGGTG	23	+	160
t1089850	1	CCAGGTTGCCTAAGGAGGGGTG	22	+	161
t1138131	1	CCAGGTTGCCTAAGGAGGGG	20	+	161
t1211607	1	CCAGGTTGCCTAAGGAGGGGTGAACCGGC	29	+	161
t1301643	1	CCAGGTTGCCTAAGGAGGGGTGAACCGG	28	+	161
t0156252	4	CAGGTTGCCTAAGGAGGGGTGAACCGGC	28	+	162
t0226107	2	CAGGTTGCCTAAGGAGGGG	19	+	162
t0536160	1	CAGGTTGCCTAAGGAGGGGTGAACCGG	27	+	162
t0770292	1	CAGGTTGCCTAAGGAGGGGTGAA	23	+	162
t1095015	1	CAGGTTGCCTAAGGAGGGGTGAAC	24	+	162
t1368615	1	CAGGTTGCCTAAGGAGGGGTG	21	+	162
t0087345	7	AGGTTGCCTAAGGAGGGGTGAACCGGC	27	+	163
t0758766	1	AGGTTGCCTAAGGAGGGG	18	+	163
t0844261	1	AGGTTGCCTAAGGAGGGGTGAACCGGCC	28	+	163
t1255664	1	AGGTTGCCTAAGGAGGGGTGAA	22	+	163
t1266747	1	AGGTTGCCTAAGGAGGGGTGAAC	23	+	163
t1374986	1	AGGTTGCCTAAGGAGGGGT	19	+	163
t0126399	5	GTTGCCTAAGGAGGGGTGAACCGG	24	+	165
t0206462	3	GTTGCCTAAGGAGGGGTGAACCG	23	+	165
t1004665	1	GTTGCCTAAGGAGGGGTGAAC	21	+	165
t1129065	1	GTTGCCTAAGGAGGGGTGAACCGGCCCAG	29	+	165
t0178723	3	TTGCCTAAGGAGGGGTGAACCGG	23	+	166
t0809511	1	TTGCCTAAGGAGGGGTGAAC	20	+	166
t1150268	1	TTGCCTAAGGAGGGGTGAACCGGCCC	26	+	166
t0075345	8	TGCCTAAGGAGGGGTGAACCGG	22	+	167
t0289153	2	TGCCTAAGGAGGGGTGAACCGGC	23	+	167
t0577932	1	TGCCTAAGGAGGGGTGAACC	20	+	167
t0723715	1	TGCCTAAGGAGGGGTGAAC	19	+	167
t1363822	1	TGCCTAAGGAGGGGTGAACCG	21	+	167
t0035504	20	GCCTAAGGAGGGGTGAACCGG	21	+	168
t0043362	16	GCCTAAGGAGGGGTGAACCG	20	+	168
t0145363	4	GCCTAAGGAGGGGTGAACCGGCCC	24	+	168
t0159220	3	GCCTAAGGAGGGGTGAACCGGC	22	+	168
t0280065	2	GCCTAAGGAGGGGTGAACCGGCC	23	+	168
t0366582	2	GCCTAAGGAGGGGTGAACC	19	+	168
t0568711	1	GCCTAAGGAGGGGTGAACCGGCCCAGG	27	+	168
t0004189	223	CCTAAGGAGGGGTGAACCGG	20	+	169
t0006675	133	CCTAAGGAGGGGTGAACCG	19	+	169
t0011458	73	CCTAAGGAGGGGTGAACCGGC	21	+	169
t0027069	27	CCTAAGGAGGGGTGAACCGGCCCAG	25	+	169
t0038320	18	CCTAAGGAGGGGTGAACCGGCCCAGG	26	+	169
t0080060	8	CCTAAGGAGGGGTGAACCGGCCC	23	+	169
t0082694	7	CCTAAGGAGGGGTGAACCGGCCCA	24	+	169
t0139863	4	CCTAAGGAGGGGTGAACCGGCC	22	+	169
t0165654	3	CCTAAGGAGGGGTGAACCGGCCCAGGT	27	+	169
t0192058	3	CCTAAGGAGGGGTGAACC	18	+	169
t0278062	2	CCTAAGGAGGGGTGAACCGGCCCAGGTCGG	30	+	169
t0390858	1	CCTAAGGAGGGGTGAACCGGCCCAGGTCG	29	+	169
t0818131	1	CCTAAGGAGGGGTGAACCGGCCCAGGTC	28	+	169
t0021208	36	CTAAGGAGGGGTGAACCGGC	20	+	170
t0027500	27	CTAAGGAGGGGTGAACCGGCCCAGGTCG	28	+	170
t0028230	26	CTAAGGAGGGGTGAACCGG	19	+	170
t0045339	15	CTAAGGAGGGGTGAACCG	18	+	170
t0051615	13	CTAAGGAGGGGTGAACCGGCC	21	+	170
t0091828	7	CTAAGGAGGGGTGAACCGGCCC	22	+	170
t0195034	3	CTAAGGAGGGGTGAACCGGCCCA	23	+	170
t0246701	2	CTAAGGAGGGGTGAACCGGCCCAG	24	+	170
t0661699	1	CTAAGGAGGGGTGAACCGGCCCAGGTCGG	29	+	170
t0855486	1	CTAAGGAGGGGTGAACCGGCCCAGGT	26	+	170
t1228193	1	CTAAGGAGGGGTGAACCGGCCCAGG	25	+	170
t0008705	99	TAAGGAGGGGTGAACCGGCC	20	+	171
t0013936	58	TAAGGAGGGGTGAACCGGC	19	+	171
t0016965	47	TAAGGAGGGGTGAACCGG	18	+	171
t0018792	42	TAAGGAGGGGTGAACCGGCCC	21	+	171
t0051585	13	TAAGGAGGGGTGAACCGGCCCAGGTCG	27	+	171
t0151623	4	TAAGGAGGGGTGAACCGGCCCAG	23	+	171
t0208762	3	TAAGGAGGGGTGAACCGGCCCAGGTCGG	28	+	171
t0258781	2	TAAGGAGGGGTGAACCGGCCCA	22	+	171
t0345093	2	TAAGGAGGGGTGAACCGGCCCAGGTCGGA	29	+	171
t0405289	1	TAAGGAGGGGTGAACCGGCCCAGGT	25	+	171
t1244412	1	TAAGGAGGGGTGAACCGGCCCAGG	24	+	171
t0004396	212	AAGGAGGGGTGAACCGGCCC	20	+	172
t0004909	188	AAGGAGGGGTGAACCGGCC	19	+	172
t0007419	118	AAGGAGGGGTGAACCGGC	18	+	172
t0031583	23	AAGGAGGGGTGAACCGGCCCAGGTCG	26	+	172
t0034678	21	AAGGAGGGGTGAACCGGCCCA	21	+	172
t0093305	6	AAGGAGGGGTGAACCGGCCCAG	22	+	172
t0110846	5	AAGGAGGGGTGAACCGGCCCAGGT	24	+	172
t0118214	5	AAGGAGGGGTGAACCGGCCCAGGTCGGA	28	+	172
t0123476	5	AAGGAGGGGTGAACCGGCCCAGGTCGG	27	+	172
t0136155	4	AAGGAGGGGTGAACCGGCCCAGG	23	+	172
t0180255	3	AAGGAGGGGTGAACCGGCCCAGGTC	25	+	172
t1229205	1	AAGGAGGGGTGAACCGGCCCAGGTCGGAA	29	+	172
t0019172	41	AGGAGGGGTGAACCGGCC	18	+	173
t0022558	34	AGGAGGGGTGAACCGGCCC	19	+	173
t0024576	31	AGGAGGGGTGAACCGGCCCAGGTCG	25	+	173
t0077342	8	AGGAGGGGTGAACCGGCCCAGGTCGG	26	+	173
t0086886	7	AGGAGGGGTGAACCGGCCCAGGTCGGA	27	+	173
t0119926	5	AGGAGGGGTGAACCGGCCCA	20	+	173
t0180870	3	AGGAGGGGTGAACCGGCCCAGGTC	24	+	173
t0217241	2	AGGAGGGGTGAACCGGCCCAG	21	+	173
t0367273	2	AGGAGGGGTGAACCGGCCCAGG	22	+	173
t0849625	1	AGGAGGGGTGAACCGGCCCAGGTCGGAA	28	+	173
t1131990	1	AGGAGGGGTGAACCGGCCCAGGT	23	+	173
t0169535	3	GGAGGGGTGAACCGGCCCAGGTC	23	+	174
t0740822	1	GGAGGGGTGAACCGGCCCAGG	21	+	174
t1273141	1	GGAGGGGTGAACCGGCCCAGGTCG	24	+	174
t0263892	2	GAGGGGTGAACCGGCCCAGGTCGGA	25	+	175
t0339904	2	GAGGGGTGAACCGGCCCAGGTCGG	24	+	175
t0675393	1	GAGGGGTGAACCGGCCCAGG	20	+	175
t1069278	1	GAGGGGTGAACCGGCCCAGGTCG	23	+	175
t0130080	4	AGGGGTGAACCGGCCCAGGTCGG	23	+	176
t0241542	2	AGGGGTGAACCGGCCCAGGTCG	22	+	176
t0908112	1	AGGGGTGAACCGGCCCAGGTCGGA	24	+	176
t0134618	4	GGGGTGAACCGGCCCAGGTCGG	22	+	177
t0302999	2	GGGGTGAACCGGCCCAGGTCG	21	+	177
t0328077	2	GGGGTGAACCGGCCCAGGTCGGA	23	+	177
t0047128	14	GGGTGAACCGGCCCAGGTCGGA	22	+	178
t0078641	8	GGGTGAACCGGCCCAGGTCG	20	+	178
t0091098	7	GGGTGAACCGGCCCAGGTCGG	21	+	178
t0324418	2	GGGTGAACCGGCCCAGGTCGGAAACGG	27	+	178
t0996772	1	GGGTGAACCGGCCCAGGTCGGAAACGGAG	29	+	178
t0386441	1	GGTGAACCGGCCCAGGTCG	19	+	179
t0594915	1	GTGAACCGGCCCAGGTCGGAAACGGAG	27	+	180
t0017933	44	TGAACCGGCCCAGGTCGGAAACGGAGCA	28	+	181
t0020155	38	TGAACCGGCCCAGGTCGGAAACGGAGCAG	29	+	181
t0077757	8	TGAACCGGCCCAGGTCGGAAACGG	24	+	181
t0079349	8	TGAACCGGCCCAGGTCGGAAACGGAG	26	+	181
t0109190	5	TGAACCGGCCCAGGTCGGAAACGGAGC	27	+	181
t0144966	4	TGAACCGGCCCAGGTCGGAAACGGA	25	+	181
t0457119	1	TGAACCGGCCCAGGTCGG	18	+	181
t1188190	1	TGAACCGGCCCAGGTCGGAAACGGAGCAGG	30	+	181
t0058077	11	GAACCGGCCCAGGTCGGAAACGGAGCAG	28	+	182
t0483119	1	GAACCGGCCCAGGTCGGAAACGGAGCAGG	29	+	182
t1393394	1	GAACCGGCCCAGGTCGGAAACGGAGCA	27	+	182
t0001070	948	AACCGGCCCAGGTCGGAAACGGAGCAGG	28	+	183
t0006934	128	AACCGGCCCAGGTCGGAAACGGAGCAG	27	+	183
t0011576	72	AACCGGCCCAGGTCGGAAACGGAGCAGGTC	30	+	183
t0015516	52	AACCGGCCCAGGTCGGAAACGGAGCAGGT	29	+	183
t0026202	28	AACCGGCCCAGGTCGGAAACGGAGCA	26	+	183
t0081366	8	AACCGGCCCAGGTCGGAAACGGAGC	25	+	183
t0117940	5	AACCGGCCCAGGTCGGAAACGGAG	24	+	183
t0280631	2	AACCGGCCCAGGTCGGAAACGGA	23	+	183
t0366699	2	AACCGGCCCAGGTCGGAAACGG	22	+	183
t0039587	18	ACCGGCCCAGGTCGGAAACGGAGCAGG	27	+	184
t0085920	7	ACCGGCCCAGGTCGGAAACGGAGCAG	26	+	184
t0703721	1	ACCGGCCCAGGTCGGAAACGGAGCAGGTC	29	+	184
t0025260	30	CCGGCCCAGGTCGGAAACGGAGCAGG	26	+	185
t0153833	4	CCGGCCCAGGTCGGAAACGGAGCAG	25	+	185
t0234052	2	CCGGCCCAGGTCGGAAACGGAGCA	24	+	185
t0346433	2	CCGGCCCAGGTCGGAAACGGAGCAGGTCA	29	+	185
t0876864	1	CCGGCCCAGGTCGGAAACGGAGCAGGTC	28	+	185
t0879624	1	CCGGCCCAGGTCGGAAACGGAGCAGGT	27	+	185
t0009015	95	CGGCCCAGGTCGGAAACGGAGCA	23	+	186
t0016859	47	CGGCCCAGGTCGGAAACGGAGCAG	24	+	186
t0033897	21	CGGCCCAGGTCGGAAACGGAGCAGG	25	+	186
t0054248	12	CGGCCCAGGTCGGAAACGGAG	21	+	186
t0071484	9	CGGCCCAGGTCGGAAACGGAGC	22	+	186
t0109744	5	CGGCCCAGGTCGGAAACGGAGCAGGT	26	+	186
t0118943	5	CGGCCCAGGTCGGAAACGGA	20	+	186
t0246859	2	CGGCCCAGGTCGGAAACGG	19	+	186
t0896988	1	CGGCCCAGGTCGGAAACGGAGCAGGTC	27	+	186
t0030986	23	GGCCCAGGTCGGAAACGGAGCA	22	+	187
t0060090	11	GGCCCAGGTCGGAAACGGAGCAGG	24	+	187
t0064965	10	GGCCCAGGTCGGAAACGGAGCAG	23	+	187
t0105685	6	GGCCCAGGTCGGAAACGGAG	20	+	187
t0120367	5	GGCCCAGGTCGGAAACGGAGCAGGT	25	+	187
t0131748	4	GGCCCAGGTCGGAAACGGA	19	+	187
t0191455	3	GGCCCAGGTCGGAAACGGAGC	21	+	187
t0259189	2	GGCCCAGGTCGGAAACGGAGCAGGTC	26	+	187
t0001556	640	GCCCAGGTCGGAAACGGAG	19	+	188
t0001825	543	GCCCAGGTCGGAAACGGAGCA	21	+	188
t0002207	437	GCCCAGGTCGGAAACGGAGCAG	22	+	188
t0002948	326	GCCCAGGTCGGAAACGGAGCAGGTC	25	+	188
t0003184	300	GCCCAGGTCGGAAACGGAGCAGG	23	+	188
t0003413	277	GCCCAGGTCGGAAACGGA	18	+	188
t0004037	232	GCCCAGGTCGGAAACGGAGC	20	+	188
t0009549	89	GCCCAGGTCGGAAACGGAGCAGGT	24	+	188
t0074756	8	GCCCAGGTCGGAAACGGAGCAGGTCA	26	+	188
t0000768	1322	CCCAGGTCGGAAACGGAGCA	20	+	189
t0002963	324	CCCAGGTCGGAAACGGAGCAG	21	+	189
t0003039	315	CCCAGGTCGGAAACGGAGCAGG	22	+	189
t0007908	110	CCCAGGTCGGAAACGGAGCAGGTC	24	+	189
t0012496	66	CCCAGGTCGGAAACGGAGC	19	+	189
t0014122	57	CCCAGGTCGGAAACGGAG	18	+	189
t0016582	48	CCCAGGTCGGAAACGGAGCAGGT	23	+	189
t0206859	3	CCCAGGTCGGAAACGGAGCAGGTCA	25	+	189
t0621393	1	CCCAGGTCGGAAACGGAGCAGGTCAAA	27	+	189
t0001150	881	CCAGGTCGGAAACGGAGCA	19	+	190
t0003456	274	CCAGGTCGGAAACGGAGCAGG	21	+	190
t0003582	264	CCAGGTCGGAAACGGAGCAG	20	+	190
t0005980	150	CCAGGTCGGAAACGGAGCAGGTC	23	+	190
t0006712	132	CCAGGTCGGAAACGGAGCAGGT	22	+	190
t0008963	96	CCAGGTCGGAAACGGAGC	18	+	190
t0046988	14	CCAGGTCGGAAACGGAGCAGGTCA	24	+	190
t0343727	2	CCAGGTCGGAAACGGAGCAGGTCAAA	26	+	190
t1365217	1	CCAGGTCGGAAACGGAGCAGGTCAAAA	27	+	190
t0000148	8997	CAGGTCGGAAACGGAGCA	18	+	191
t0000328	3483	CAGGTCGGAAACGGAGCAG	19	+	191
t0000364	3034	CAGGTCGGAAACGGAGCAGG	20	+	191
t0000730	1384	CAGGTCGGAAACGGAGCAGGTC	22	+	191
t0000878	1173	CAGGTCGGAAACGGAGCAGGT	21	+	191
t0003233	294	CAGGTCGGAAACGGAGCAGGTCA	23	+	191
t0021967	35	CAGGTCGGAAACGGAGCAGGTCAA	24	+	191
t0051900	13	CAGGTCGGAAACGGAGCAGGTCAAA	25	+	191
t0785654	1	CAGGTCGGAAACGGAGCAGGTCAAAACTC	29	+	191
t0813066	1	CAGGTCGGAAACGGAGCAGGTCAAAA	26	+	191
t0000647	1610	AGGTCGGAAACGGAGCAGGT	20	+	192
t0000806	1267	AGGTCGGAAACGGAGCAGGTC	21	+	192
t0000977	1051	AGGTCGGAAACGGAGCAGG	19	+	192
t0001387	721	AGGTCGGAAACGGAGCAG	18	+	192
t0005677	158	AGGTCGGAAACGGAGCAGGTCA	22	+	192
t0025787	29	AGGTCGGAAACGGAGCAGGTCAA	23	+	192
t0054354	12	AGGTCGGAAACGGAGCAGGTCAAA	24	+	192
t0397597	1	AGGTCGGAAACGGAGCAGGTCAAAAC	26	+	192
t0785785	1	AGGTCGGAAACGGAGCAGGTCAAAA	25	+	192
t0012036	69	GGTCGGAAACGGAGCAGGT	19	+	193
t0015571	51	GGTCGGAAACGGAGCAGG	18	+	193
t0016243	49	GGTCGGAAACGGAGCAGGTC	20	+	193
t0337457	2	GGTCGGAAACGGAGCAGGTCA	21	+	193
t0000676	1515	GTCGGAAACGGAGCAGGTC	19	+	194
t0001737	570	GTCGGAAACGGAGCAGGT	18	+	194
t0006226	143	GTCGGAAACGGAGCAGGTCA	20	+	194
t0008440	102	GTCGGAAACGGAGCAGGTCAAAACTC	26	+	194
t0041267	17	GTCGGAAACGGAGCAGGTCAA	21	+	194
t0064637	10	GTCGGAAACGGAGCAGGTCAAAACTCC	27	+	194
t0104186	6	GTCGGAAACGGAGCAGGTCAAAAC	24	+	194
t0138091	4	GTCGGAAACGGAGCAGGTCAAAACTCCC	28	+	194
t0292906	2	GTCGGAAACGGAGCAGGTCAAAA	23	+	194
t0302020	2	GTCGGAAACGGAGCAGGTCAAA	22	+	194
t0528538	1	GTCGGAAACGGAGCAGGTCAAAACT	25	+	194
t0011566	72	TCGGAAACGGAGCAGGTC	18	+	195
t0046670	15	TCGGAAACGGAGCAGGTCA	19	+	195
t0168057	3	TCGGAAACGGAGCAGGTCAAAACTC	25	+	195
t0181143	3	TCGGAAACGGAGCAGGTCAA	20	+	195
t1244850	1	TCGGAAACGGAGCAGGTCAAAA	22	+	195
t1354992	1	TCGGAAACGGAGCAGGTCAAAACT	24	+	195
t1372998	1	TCGGAAACGGAGCAGGTCAAA	21	+	195
t0078002	8	CGGAAACGGAGCAGGTCA	18	+	196
t0634081	1	CGGAAACGGAGCAGGTCAAAACT	23	+	196
t0758393	1	CGGAAACGGAGCAGGTCAAA	20	+	196
t0268273	2	GGAAACGGAGCAGGTCAAAACTC	23	+	197
t0122406	5	GAAACGGAGCAGGTCAAAACTC	22	+	198
t0041843	17	AAACGGAGCAGGTCAAAACTC	21	+	199
t0272567	2	AAACGGAGCAGGTCAAAACT	20	+	199
t0815851	1	AAACGGAGCAGGTCAAAACTCC	22	+	199
t0025448	29	AACGGAGCAGGTCAAAACTC	20	+	200
t0180954	3	AACGGAGCAGGTCAAAACT	19	+	200
t0451488	1	AACGGAGCAGGTCAAAACTCC	21	+	200
t0613297	1	AACGGAGCAGGTCAAAAC	18	+	200
t0105749	6	ACGGAGCAGGTCAAAACTC	19	+	201
t0196905	3	ACGGAGCAGGTCAAAACT	18	+	201
t0552568	1	ACGGAGCAGGTCAAAACTCC	20	+	201
t0571887	1	ACGGAGCAGGTCAAAACTCCCGTG	24	+	201
t0093339	6	CGGAGCAGGTCAAAACTC	18	+	202
t0094655	6	AGCAGGTCAAAACTCCCGTGCTGATC	26	+	205
t0923078	1	AGCAGGTCAAAACTCCCG	18	+	205
t0871077	1	GCAGGTCAAAACTCCCGTGCTGATC	25	+	206
t0041014	17	CAGGTCAAAACTCCCGTGC	19	+	207
t0193700	3	CAGGTCAAAACTCCCGTGCTGA	22	+	207
t0217171	2	CAGGTCAAAACTCCCGTG	18	+	207
t0343967	2	CAGGTCAAAACTCCCGTGCTGATC	24	+	207
t0705303	1	AGGTCAAAACTCCCGTGCTGATC	23	+	208
t1018829	1	GGTCAAAACTCCCGTGCTGA	20	+	209
t0034033	21	GTCAAAACTCCCGTGCTG	18	+	210
t0044579	15	GTCAAAACTCCCGTGCTGATC	21	+	210
t0066100	10	GTCAAAACTCCCGTGCTGA	19	+	210
t0273097	2	GTCAAAACTCCCGTGCTGATCAGTAG	26	+	210
t1107301	1	GTCAAAACTCCCGTGCTGAT	20	+	210
t0135603	4	TCAAAACTCCCGTGCTGATCAGTAG	25	+	211
t0374869	1	TCAAAACTCCCGTGCTGATCAGTAGT	26	+	211
t0574495	1	TCAAAACTCCCGTGCTGATCAGTA	24	+	211
t0787349	1	TCAAAACTCCCGTGCTGATCAG	22	+	211
t1398813	1	TCAAAACTCCCGTGCTGA	18	+	211
t0150800	4	CAAAACTCCCGTGCTGATCAGTAG	24	+	212
t0260785	2	CAAAACTCCCGTGCTGATCAGTAGTGG	27	+	212
t0304268	2	CAAAACTCCCGTGCTGATCAGTAGTGGG	28	+	212
t0345097	2	CAAAACTCCCGTGCTGATCAGTAGT	25	+	212
t0357374	2	CAAAACTCCCGTGCTGATCAGTAGTG	26	+	212
t0583373	1	CAAAACTCCCGTGCTGATC	19	+	212
t1116025	1	CAAAACTCCCGTGCTGATCAG	21	+	212
t0008386	103	AAAACTCCCGTGCTGATCAGTAGTGG	26	+	213
t0013258	62	AAAACTCCCGTGCTGATCAGTAGTGGG	27	+	213
t0014326	57	AAAACTCCCGTGCTGATCAGTAGTG	25	+	213
t0016529	48	AAAACTCCCGTGCTGATCAGTAG	23	+	213
t0035892	20	AAAACTCCCGTGCTGATCAG	20	+	213
t0040691	17	AAAACTCCCGTGCTGATC	18	+	213
t0079811	8	AAAACTCCCGTGCTGATCAGTAGT	24	+	213
t0136189	4	AAAACTCCCGTGCTGATCAGTAGTGGGA	28	+	213
t0152873	4	AAAACTCCCGTGCTGATCAGTA	22	+	213
t0673485	1	AAAACTCCCGTGCTGATCA	19	+	213
t0034216	21	AAACTCCCGTGCTGATCAGTAG	22	+	214
t0035648	20	AAACTCCCGTGCTGATCAGTAGTGG	25	+	214
t0056806	12	AAACTCCCGTGCTGATCAGTAGTGGG	26	+	214
t0058103	11	AAACTCCCGTGCTGATCAG	19	+	214
t0058243	11	AAACTCCCGTGCTGATCAGTAGTG	24	+	214
t0132752	4	AAACTCCCGTGCTGATCAGTAGT	23	+	214
t0740607	1	AAACTCCCGTGCTGATCAGT	20	+	214
t0080663	8	AACTCCCGTGCTGATCAGTAGTGG	24	+	215
t0102275	6	AACTCCCGTGCTGATCAGTAG	21	+	215
t0129510	4	AACTCCCGTGCTGATCAG	18	+	215
t0189361	3	AACTCCCGTGCTGATCAGTAGTGGG	25	+	215
t0201492	3	AACTCCCGTGCTGATCAGTAGTG	23	+	215
t0321768	2	AACTCCCGTGCTGATCAGTAGT	22	+	215
t0525031	1	AACTCCCGTGCTGATCAGTA	20	+	215
t0052158	13	ACTCCCGTGCTGATCAGTAGTGG	23	+	216
t0132509	4	ACTCCCGTGCTGATCAGTAG	20	+	216
t0224601	2	ACTCCCGTGCTGATCAGTAGTG	22	+	216
t0702094	1	ACTCCCGTGCTGATCAGTAGTGGG	24	+	216
t0184402	3	CTCCCGTGCTGATCAGTAGTGG	22	+	217
t0242776	2	CTCCCGTGCTGATCAGTAG	19	+	217
t0289625	2	CTCCCGTGCTGATCAGTAGTG	21	+	217
t0306160	2	CTCCCGTGCTGATCAGTAGTGGG	23	+	217
t1321087	1	CTCCCGTGCTGATCAGTAGT	20	+	217
t0289270	2	TCCCGTGCTGATCAGTAG	18	+	218
t0316233	2	TCCCGTGCTGATCAGTAGT	19	+	218
t0100522	6	CCCGTGCTGATCAGTAGTGGG	21	+	219
t0108685	5	CCCGTGCTGATCAGTAGTGG	20	+	219
t0689050	1	CCCGTGCTGATCAGTAGTGGGATCGC	26	+	219
t1172339	1	CCCGTGCTGATCAGTAGT	18	+	219
t1229617	1	CCCGTGCTGATCAGTAGTG	19	+	219
t0014448	56	CCGTGCTGATCAGTAGTGG	19	+	220
t0020685	37	CCGTGCTGATCAGTAGTGGG	20	+	220
t0038560	18	CCGTGCTGATCAGTAGTG	18	+	220
t0061385	11	CCGTGCTGATCAGTAGTGGGA	21	+	220
t0176588	3	CCGTGCTGATCAGTAGTGGGATCGC	25	+	220
t0383287	1	CCGTGCTGATCAGTAGTGGGATCG	24	+	220
t0588267	1	CCGTGCTGATCAGTAGTGGGATC	23	+	220
t1305852	1	CCGTGCTGATCAGTAGTGGGATCGCGC	27	+	220
t0005314	170	CGTGCTGATCAGTAGTGG	18	+	221
t0018935	41	CGTGCTGATCAGTAGTGGG	19	+	221
t0105518	6	CGTGCTGATCAGTAGTGGGA	20	+	221
t0545606	1	CGTGCTGATCAGTAGTGGGATCGC	24	+	221
t1360224	1	CGTGCTGATCAGTAGTGGGATCGCG	25	+	221
t0072427	9	GTGCTGATCAGTAGTGGG	18	+	222
t0086341	7	GTGCTGATCAGTAGTGGGA	19	+	222
t0037178	19	TGCTGATCAGTAGTGGGA	18	+	223
t0064526	10	TGCTGATCAGTAGTGGGAT	19	+	223
t0193582	3	TGCTGATCAGTAGTGGGATC	20	+	223
t0092636	6	GCTGATCAGTAGTGGGAT	18	+	224
t0847644	1	GCTGATCAGTAGTGGGATC	19	+	224
t0291647	2	CTGATCAGTAGTGGGATCGCG	21	+	225
t0426569	1	CTGATCAGTAGTGGGATCGCGCC	23	+	225
t1101813	1	CTGATCAGTAGTGGGATCGCGCCTGTG	27	+	225
t1170955	1	CTGATCAGTAGTGGGATCG	19	+	225
t1264612	1	CTGATCAGTAGTGGGATC	18	+	225
t0038038	18	ATCAGTAGTGGGATCGCG	18	+	228
t0056987	11	ATCAGTAGTGGGATCGCGCCTG	22	+	228
t0244117	2	ATCAGTAGTGGGATCGCGC	19	+	228
t1144713	1	ATCAGTAGTGGGATCGCGCC	20	+	228
t0037935	18	TCAGTAGTGGGATCGCGCCTG	21	+	229
t0072501	9	TCAGTAGTGGGATCGCGC	18	+	229
t0093412	6	TCAGTAGTGGGATCGCGCCTGTG	23	+	229
t0195107	3	TCAGTAGTGGGATCGCGCC	19	+	229
t0259245	2	TCAGTAGTGGGATCGCGCCTGT	22	+	229
t0261998	2	TCAGTAGTGGGATCGCGCCT	20	+	229
t0018088	43	CAGTAGTGGGATCGCGCCTG	20	+	230
t0190805	3	CAGTAGTGGGATCGCGCCTGTGA	23	+	230
t0635297	1	CAGTAGTGGGATCGCGCCT	19	+	230
t0978748	1	CAGTAGTGGGATCGCGCCTGTG	22	+	230
t0040129	17	AGTAGTGGGATCGCGCCTG	19	+	231
t0085059	7	AGTAGTGGGATCGCGCCTGTGAATAG	26	+	231
t0096907	6	AGTAGTGGGATCGCGCCTGTGA	22	+	231
t0271976	2	AGTAGTGGGATCGCGCCTGT	20	+	231
t0282403	2	AGTAGTGGGATCGCGCCTGTGAATAGC	27	+	231
t1132509	1	AGTAGTGGGATCGCGCCTGTG	21	+	231
t0721829	1	GTAGTGGGATCGCGCCTGTGAATAGC	26	+	232
t1241965	1	GTAGTGGGATCGCGCCTGTG	20	+	232
t0297605	2	TAGTGGGATCGCGCCTGTGAATAGCC	26	+	233
t0595084	1	TAGTGGGATCGCGCCTGTGAATAGCCA	27	+	233
t0957996	1	TAGTGGGATCGCGCCTGTGA	20	+	233
t0627974	1	AGTGGGATCGCGCCTGTGAATAG	23	+	234
t1273625	1	AGTGGGATCGCGCCTGTGAATAGC	24	+	234
t0131919	4	GTGGGATCGCGCCTGTGAATAGCCA	25	+	235
t0164151	3	GTGGGATCGCGCCTGTGAATAGC	23	+	235
t0317184	2	GTGGGATCGCGCCTGTGAATAGCC	24	+	235
t0653946	1	GTGGGATCGCGCCTGTGAA	19	+	235
t0116462	5	TGGGATCGCGCCTGTGAATAGCCACT	26	+	236
t0207162	3	TGGGATCGCGCCTGTGAATAGCC	23	+	236
t0279923	2	TGGGATCGCGCCTGTGAATAGC	22	+	236
t0291956	2	TGGGATCGCGCCTGTGAATAGCCA	24	+	236
t0303470	2	TGGGATCGCGCCTGTGAATAGCCACTG	27	+	236
t0327199	2	TGGGATCGCGCCTGTGAATAG	21	+	236
t0866089	1	TGGGATCGCGCCTGTGAA	18	+	236
t0150268	4	GGATCGCGCCTGTGAATAGC	20	+	238
t0183553	3	GGATCGCGCCTGTGAATAGCCACTGCA	27	+	238
t0246191	2	GGATCGCGCCTGTGAATAGCC	21	+	238
t0267933	2	GGATCGCGCCTGTGAATAGCCACT	24	+	238
t0357805	2	GGATCGCGCCTGTGAATAG	19	+	238
t0659094	1	GGATCGCGCCTGTGAATAGCCACTG	25	+	238
t1083685	1	GGATCGCGCCTGTGAATAGCCACTGC	26	+	238
t0136944	4	GATCGCGCCTGTGAATAGCCACTG	24	+	239
t0153499	4	GATCGCGCCTGTGAATAGCCA	21	+	239
t0175003	3	GATCGCGCCTGTGAATAGCCACTGCACT	28	+	239
t0323290	2	GATCGCGCCTGTGAATAGCCACTGCA	26	+	239
t0330313	2	GATCGCGCCTGTGAATAGC	19	+	239
t0333577	2	GATCGCGCCTGTGAATAGCC	20	+	239
t0838756	1	GATCGCGCCTGTGAATAGCCACT	23	+	239
t0003216	296	ATCGCGCCTGTGAATAGC	18	+	240
t0004536	205	ATCGCGCCTGTGAATAGCCACTG	23	+	240
t0012353	67	ATCGCGCCTGTGAATAGCC	19	+	240
t0014215	57	ATCGCGCCTGTGAATAGCCACT	22	+	240
t0025595	29	ATCGCGCCTGTGAATAGCCACTGCACT	27	+	240
t0027094	27	ATCGCGCCTGTGAATAGCCACTGCA	25	+	240
t0034971	20	ATCGCGCCTGTGAATAGCCA	20	+	240
t0037585	19	ATCGCGCCTGTGAATAGCCACTGC	24	+	240
t0078577	8	ATCGCGCCTGTGAATAGCCAC	21	+	240
t0232496	2	ATCGCGCCTGTGAATAGCCACTGCAC	26	+	240
t1047699	1	ATCGCGCCTGTGAATAGCCACTGCACTC	28	+	240
t0067629	9	TCGCGCCTGTGAATAGCCACTG	22	+	241
t0133476	4	TCGCGCCTGTGAATAGCC	18	+	241
t0146699	4	TCGCGCCTGTGAATAGCCACT	21	+	241
t0277612	2	TCGCGCCTGTGAATAGCCACTGCACT	26	+	241
t0397159	1	TCGCGCCTGTGAATAGCCACTGC	23	+	241
t0659371	1	TCGCGCCTGTGAATAGCCACTGCACTCC	28	+	241
t0990844	1	TCGCGCCTGTGAATAGCCAC	20	+	241
t0035388	20	CGCGCCTGTGAATAGCCACTG	21	+	242
t0124261	5	CGCGCCTGTGAATAGCCACTGCACT	25	+	242
t0140704	4	CGCGCCTGTGAATAGCCACTGCACTCC	27	+	242
t0213814	3	CGCGCCTGTGAATAGCCACTGC	22	+	242
t0341712	2	CGCGCCTGTGAATAGCCACT	20	+	242
t0515444	1	CGCGCCTGTGAATAGCCACTGCA	23	+	242
t0959777	1	CGCGCCTGTGAATAGCCACTGCACTC	26	+	242
t1235306	1	CGCGCCTGTGAATAGCCACTGCACTCCAG	29	+	242
t0087195	7	GCGCCTGTGAATAGCCACTG	20	+	243
t0757890	1	GCGCCTGTGAATAGCCACTGCACTCCAG	28	+	243
t0030072	24	CGCCTGTGAATAGCCACTG	19	+	244
t0147826	4	CGCCTGTGAATAGCCACTGC	20	+	244
t0201684	3	CGCCTGTGAATAGCCACTGCACTCCAG	27	+	244
t0818275	1	CGCCTGTGAATAGCCACT	18	+	244
t0824452	1	CGCCTGTGAATAGCCACTGCACTCCA	26	+	244
t1161251	1	CGCCTGTGAATAGCCACTGCACT	23	+	244
t0619811	1	GCCTGTGAATAGCCACTG	18	+	245
t0747593	1	GCCTGTGAATAGCCACTGCACTCCAG	26	+	245
t0130872	4	CCTGTGAATAGCCACTGCACTCCAG	25	+	246
t0227472	2	CCTGTGAATAGCCACTGCACTCC	23	+	246
t0341890	2	CCTGTGAATAGCCACTGCACTCCAGC	26	+	246
t0625405	1	CCTGTGAATAGCCACTGCACTCCA	24	+	246
t1046665	1	CCTGTGAATAGCCACTGCACT	21	+	246
t0045026	15	TGTGAATAGCCACTGCACTCCAG	23	+	248
t0510163	1	TGTGAATAGCCACTGCACT	19	+	248
t0982117	1	TGTGAATAGCCACTGCACTC	20	+	248
t0712270	1	GTGAATAGCCACTGCACTCCAG	22	+	249
t1407563	1	GTGAATAGCCACTGCACTCCAGC	23	+	249
t0043147	16	TGAATAGCCACTGCACTCC	19	+	250
t0049414	14	TGAATAGCCACTGCACTCCAG	21	+	250
t0135330	4	TGAATAGCCACTGCACTCCAGC	22	+	250
t0172996	3	TGAATAGCCACTGCACTCCAGCCTG	25	+	250
t0189019	3	TGAATAGCCACTGCACTCCAGCCTGGGC	28	+	250
t0204473	3	TGAATAGCCACTGCACTCCAGCC	23	+	250
t0359449	2	TGAATAGCCACTGCACTCCA	20	+	250
t0367146	2	TGAATAGCCACTGCACTC	18	+	250
t0493615	1	TGAATAGCCACTGCACTCCAGCCTGGGCA	29	+	250
t1225256	1	TGAATAGCCACTGCACTCCAGCCTGG	26	+	250
t0058555	11	AATAGCCACTGCACTCCAG	19	+	252
t0199031	3	AATAGCCACTGCACTCCAGCCTG	23	+	252
t0211096	3	AATAGCCACTGCACTCCAGCCTGGGC	26	+	252
t0305906	2	AATAGCCACTGCACTCCAGC	20	+	252
t0414621	1	AATAGCCACTGCACTCCAGCC	21	+	252
t0997063	1	AATAGCCACTGCACTCCAGCCTGGG	25	+	252
t1350227	1	TAGCCACTGCACTCCAGCCTGG	22	+	254
t0046010	15	GCCACTGCACTCCAGCCTG	19	-	256
t0110402	5	GCCACTGCACTCCAGCCTGG	20	-	256
t0274976	2	GCCACTGCACTCCAGCCT	18	-	256
t0053322	12	CCACTGCACTCCAGCCTG	18	-	257
t0131053	4	CCACTGCACTCCAGCCTG	18	+	257
t0140105	4	CCACTGCACTCCAGCCTGGG	20	-	257
t0167329	3	CCACTGCACTCCAGCCTGG	19	-	257
t0255005	2	CCACTGCACTCCAGCCTGGGC	21	+	257
t0304702	2	CCACTGCACTCCAGCCTGGG	20	+	257
t1264467	1	CCACTGCACTCCAGCCTGG	19	+	257
t1330214	1	CCACTGCACTCCAGCCTGGGCA	22	-	257
t0025446	29	CACTGCACTCCAGCCTGG	18	-	258
t0042732	16	CACTGCACTCCAGCCTGGGCAA	22	-	258
t0042937	16	CACTGCACTCCAGCCTGGG	19	-	258
t0128858	4	CACTGCACTCCAGCCTGGGCA	21	-	258
t0224996	2	CACTGCACTCCAGCCTGGGC	20	+	258
t0302169	2	CACTGCACTCCAGCCTGGGC	20	-	258
t0395003	1	CACTGCACTCCAGCCTGGGCAAC	23	-	258
t0774143	1	CACTGCACTCCAGCCTGGGCA	21	+	258
t0996396	1	CACTGCACTCCAGCCTGGG	19	+	258
t1173262	1	CACTGCACTCCAGCCTGGGCAACA	24	-	258
t0295290	2	ACTGCACTCCAGCCTGGGCA	20	-	259
t0299639	2	ACTGCACTCCAGCCTGGGCAA	21	-	259
t0571132	1	ACTGCACTCCAGCCTGGGC	19	+	259
t0604493	1	ACTGCACTCCAGCCTGGG	18	-	259
t0742052	1	ACTGCACTCCAGCCTGGGCAACA	23	-	259
t0881019	1	ACTGCACTCCAGCCTGGGCAAC	22	-	259
t0315149	2	CTGCACTCCAGCCTGGGCAACATAGCG	27	+	260
t0329922	2	CTGCACTCCAGCCTGGGCAACA	22	-	260
t0372565	1	CTGCACTCCAGCCTGGGCAACAT	23	-	260
t0608968	1	CTGCACTCCAGCCTGGGC	18	+	260
t1118963	1	CTGCACTCCAGCCTGGGC	18	-	260
t1259075	1	CTGCACTCCAGCCTGGGCAA	20	-	260
t0353586	2	TGCACTCCAGCCTGGGCAA	19	-	261
t0753415	1	TGCACTCCAGCCTGGGCAACATAGCG	26	+	261
t0199392	3	GCACTCCAGCCTGGGCAACATAGCG	25	+	262
t0209298	3	GCACTCCAGCCTGGGCAA	18	-	262
t1216282	1	GCACTCCAGCCTGGGCAACATAGC	24	+	262
t0034649	21	CACTCCAGCCTGGGCAACATAGCG	24	+	263
t0054915	12	CACTCCAGCCTGGGCAACATAG	22	+	263
t0100795	6	CACTCCAGCCTGGGCAACA	19	-	263
t0133634	4	CACTCCAGCCTGGGCAACATAGCGAG	26	+	263
t0191499	3	CACTCCAGCCTGGGCAAC	18	-	263
t0971417	1	CACTCCAGCCTGGGCAACATAGCGA	25	+	263
t1296227	1	CACTCCAGCCTGGGCAACATAGC	23	+	263
t0379598	1	ACTCCAGCCTGGGCAACATAGCGAG	25	+	264
t0608089	1	ACTCCAGCCTGGGCAACATAG	21	+	264
t0720408	1	ACTCCAGCCTGGGCAACATAGCGA	24	+	264
t0035140	20	CTCCAGCCTGGGCAACATAG	20	+	265
t0124239	5	CTCCAGCCTGGGCAACATAGCG	22	+	265
t0139805	4	CTCCAGCCTGGGCAACATAGCGAG	24	+	265
t0371103	2	CTCCAGCCTGGGCAACATAGCGAGA	25	+	265
t1255901	1	CTCCAGCCTGGGCAACAT	18	-	265
t0353503	2	TCCAGCCTGGGCAACATAG	19	+	266
t0044730	15	CCAGCCTGGGCAACATAG	18	+	267
t0087865	7	CCAGCCTGGGCAACATAGCGAG	22	+	267
t0155898	4	CCAGCCTGGGCAACATAGCGAGA	23	+	267
t0178003	3	CCAGCCTGGGCAACATAGCGAGACCCCG	28	+	267
t0374825	1	CCAGCCTGGGCAACATAGCGAGACC	25	+	267
t0793507	1	CCAGCCTGGGCAACATAGCG	20	+	267
t1075023	1	CCAGCCTGGGCAACATAGCGAGACCCCGT	29	+	267
t0100851	6	CAGCCTGGGCAACATAGCGAG	21	+	268
t1058714	1	CAGCCTGGGCAACATAGCGAGACCCCGT	28	+	268
t1270372	1	CAGCCTGGGCAACATAGCGAGAC	23	+	268
t1339777	1	CAGCCTGGGCAACATAGCGAGACCC	25	+	268
t0032079	22	AGCCTGGGCAACATAGCGAGACCCCGT	27	+	269
t0039590	18	AGCCTGGGCAACATAGCGAGACCC	24	+	269
t0064316	10	AGCCTGGGCAACATAGCG	18	+	269
t0113414	5	AGCCTGGGCAACATAGCGAG	20	+	269
t0132998	4	AGCCTGGGCAACATAGCGAGACCCCGTC	28	+	269
t0155754	4	AGCCTGGGCAACATAGCGAGACCCCG	26	+	269
t0184928	3	AGCCTGGGCAACATAGCGAGACC	23	+	269
t0201346	3	AGCCTGGGCAACATAGCGAGACCCC	25	+	269
t0343498	2	AGCCTGGGCAACATAGCGAGA	21	+	269
t0056297	12	GCCTGGGCAACATAGCGAGACCCCGT	26	+	270
t0093887	6	GCCTGGGCAACATAGCGAGACCC	23	+	270
t0131041	4	GCCTGGGCAACATAGCGAGACCCCGTC	27	+	270
t0348010	2	GCCTGGGCAACATAGCGAGACC	22	+	270
t0348802	2	GCCTGGGCAACATAGCGAG	19	+	270
t0403498	1	GCCTGGGCAACATAGCGAGAC	21	+	270
t0001573	635	CCTGGGCAACATAGCGAGACCC	22	+	271
t0002999	319	CCTGGGCAACATAGCGAGACCCCGTC	26	+	271
t0003341	283	CCTGGGCAACATAGCGAGACCCCGT	25	+	271
t0006313	141	CCTGGGCAACATAGCGAG	18	+	271
t0010671	79	CCTGGGCAACATAGCGAGACC	21	+	271
t0028394	26	CCTGGGCAACATAGCGAGACCCCG	24	+	271
t0030518	24	CCTGGGCAACATAGCGAGACCCC	23	+	271
t0038330	18	CCTGGGCAACATAGCGAGAC	20	+	271
t0048064	14	CCTGGGCAACATAGCGAGACCCCGTCTC	28	+	271
t0057931	11	CCTGGGCAACATAGCGAGACCCCGTCT	27	+	271
t0081458	8	CCTGGGCAACATAGCGAGA	19	+	271
t0011562	72	CTGGGCAACATAGCGAGACCC	21	+	272
t0035113	20	CTGGGCAACATAGCGAGACCCCGTC	25	+	272
t0072548	9	CTGGGCAACATAGCGAGACCCCGT	24	+	272
t0090734	7	CTGGGCAACATAGCGAGACC	20	+	272
t0131312	4	CTGGGCAACATAGCGAGAC	19	+	272
t0249439	2	CTGGGCAACATAGCGAGACCCC	22	+	272
t0282340	2	CTGGGCAACATAGCGAGACCCCG	23	+	272
t0088782	7	TGGGCAACATAGCGAGACC	19	+	273
t0101093	6	TGGGCAACATAGCGAGACCCC	21	+	273
t0116647	5	TGGGCAACATAGCGAGACCCCGTC	24	+	273
t0124679	5	TGGGCAACATAGCGAGACCC	20	+	273
t1052152	1	TGGGCAACATAGCGAGACCCCG	22	+	273
t1092516	1	TGGGCAACATAGCGAGACCCCGTCTC	26	+	273
t0425385	1	GGGCAACATAGCGAGACCC	19	+	274
t0947316	1	GGGCAACATAGCGAGACCCCG	21	+	274
t0031519	23	GGCAACATAGCGAGACCCCGT	21	+	275
t0058072	11	GGCAACATAGCGAGACCCCGTC	22	+	275
t0104986	6	GGCAACATAGCGAGACCCCG	20	+	275
t1156874	1	GGCAACATAGCGAGACCCCGTCT	23	+	275
t0017754	44	GCAACATAGCGAGACCCCGT	20	+	276
t0124152	5	GCAACATAGCGAGACCCCG	19	+	276
t0003474	272	CAACATAGCGAGACCCCGT	19	+	277
t0026786	28	CAACATAGCGAGACCCCG	18	+	277
t0012712	65	AACATAGCGAGACCCCGT	18	+	278
t0775276	1	AACATAGCGAGACCCCGTC	19	+	278
total	447622

## Sheet: Sheet2
sRNAs Id in Dicer K/D sample	Count	Sequence	Length	Strand, positive(+) or negative(-)	The start site on 7SL RNA
t0208447	4	GCCGGGCGCGGTGGCGCGTGCCTGTAG	27	+	1
t0298635	3	GCCGGGCGCGGTGGCGCGTGCCTGTAGT	28	+	1
t0398794	2	GCCGGGCGCGGTGGCGCGTGCCTGTAGTC	29	+	1
t0772257	1	GCCGGGCGCGGTGGCGCGTG	20	+	1
t1390813	1	GCCGGGCGCGGTGGCGCGTGCCTG	24	+	1
t0762127	1	CGCGGTGGCGCGTGCCTGTAGTCCCAG	27	+	7
t1380764	1	CGCGGTGGCGCGTGCCTGTAGT	22	+	7
t0270281	3	GCGGTGGCGCGTGCCTGTAGT	21	+	8
t0411947	2	GCGGTGGCGCGTGCCTGTAG	20	+	8
t0993553	1	GCGGTGGCGCGTGCCTGTAGTC	22	+	8
t0009298	142	CGGTGGCGCGTGCCTGTAGTCCC	23	+	9
t0050981	23	CGGTGGCGCGTGCCTGTAGTCC	22	+	9
t0117935	9	CGGTGGCGCGTGCCTGTAGTC	21	+	9
t0138643	7	CGGTGGCGCGTGCCTGTAGTCCCAG	25	+	9
t0189052	5	CGGTGGCGCGTGCCTGTAGTCCCAGC	26	+	9
t0235707	4	CGGTGGCGCGTGCCTGTAGTCCCA	24	+	9
t0256650	3	CGGTGGCGCGTGCCTGTAGT	20	+	9
t0320909	3	CGGTGGCGCGTGCCTGTAG	19	+	9
t1519712	1	CGGTGGCGCGTGCCTGTAGTCCCAGCT	27	+	9
t0037500	33	GGTGGCGCGTGCCTGTAGTCCC	22	+	10
t0139748	7	GGTGGCGCGTGCCTGTAGTCCCAGC	25	+	10
t0207541	4	GGTGGCGCGTGCCTGTAGTCC	21	+	10
t0387487	2	GGTGGCGCGTGCCTGTAGTC	20	+	10
t0464492	2	GGTGGCGCGTGCCTGTAGTCCCAG	24	+	10
t1362643	1	GGTGGCGCGTGCCTGTAGTCCCAGCTA	27	+	10
t0210323	4	GTGGCGCGTGCCTGTAGTCCCAGC	24	+	11
t0225904	4	GTGGCGCGTGCCTGTAGTCCC	21	+	11
t0428139	2	GTGGCGCGTGCCTGTAGTCCCA	22	+	11
t0666286	1	GTGGCGCGTGCCTGTAGTCCCAG	23	+	11
t1490081	1	GTGGCGCGTGCCTGTAGTC	19	+	11
t1635299	1	TGGCGCGTGCCTGTAGTCCC	20	+	12
t0890312	1	GGCGCGTGCCTGTAGTCCCAGCTACTCGGG	30	+	13
t1596066	1	GGCGCGTGCCTGTAGTCCCAGC	22	+	13
t0203737	4	GCGCGTGCCTGTAGTCCC	18	+	14
t0387240	2	GCGCGTGCCTGTAGTCCCAGC	21	+	14
t0774319	1	GCGCGTGCCTGTAGTCCCAGCTACTCGGG	29	+	14
t0808709	1	GCGCGTGCCTGTAGTCCCAGCT	22	+	14
t1003867	1	GCGCGTGCCTGTAGTCCCAGC	21	-	14
t0258744	3	CGCGTGCCTGTAGTCCCAG	19	+	15
t0394383	2	CGCGTGCCTGTAGTCCCAGC	20	+	15
t0496912	2	CGCGTGCCTGTAGTCCCAGCTAC	23	+	15
t1131203	1	CGCGTGCCTGTAGTCCCAGCTACTCGGG	28	+	15
t1169674	1	CGCGTGCCTGTAGTCCCAGCTACTC	25	+	15
t1668000	1	CGCGTGCCTGTAGTCCCAGCTACTCGGGA	29	+	15
t0272563	3	GCGTGCCTGTAGTCCCAG	18	+	16
t0382641	2	GCGTGCCTGTAGTCCCAGCTACTC	24	+	16
t0602208	1	GCGTGCCTGTAGTCCCAGCTACTCGGGAGG	30	+	16
t1402361	1	GCGTGCCTGTAGTCCCAGC	19	+	16
t1559677	1	GCGTGCCTGTAGTCCCAGCTACTCGGG	27	+	16
t0066080	17	CGTGCCTGTAGTCCCAGCTACTCGGG	26	+	17
t0249241	3	CGTGCCTGTAGTCCCAGCTACTC	23	+	17
t0288737	3	CGTGCCTGTAGTCCCAGCTACTCGG	25	+	17
t0495577	2	CGTGCCTGTAGTCCCAGC	18	+	17
t0680614	1	CGTGCCTGTAGTCCCAGCTACTCGGGAGGC	30	+	17
t1217245	1	CGTGCCTGTAGTCCCAGCT	19	+	17
t1368038	1	CGTGCCTGTAGTCCCAGCTAC	21	+	17
t1599525	1	CGTGCCTGTAGTCCCAGCTACTCGGGA	27	+	17
t0440845	2	GTGCCTGTAGTCCCAGCTA	19	-	18
t0371558	2	TGCCTGTAGTCCCAGCTACTCGGG	24	+	19
t1695584	1	TGCCTGTAGTCCCAGCTACTCGGGA	25	+	19
t0261214	3	GCCTGTAGTCCCAGCTACTCGGG	23	+	20
t1504532	1	GCCTGTAGTCCCAGCTACTCGGGAGGC	27	+	20
t0039078	31	CCTGTAGTCCCAGCTACTCGGGAGGCTG	28	+	21
t0069848	16	CCTGTAGTCCCAGCTACTCGGG	22	+	21
t0301131	3	CCTGTAGTCCCAGCTACTCGG	21	+	21
t0509928	2	CCTGTAGTCCCAGCTACTCGGGA	23	+	21
t1009859	1	CCTGTAGTCCCAGCTACTCGG	21	-	21
t1117353	1	CCTGTAGTCCCAGCTACTCGGGAGGCTGA	29	+	21
t0009187	144	CTGTAGTCCCAGCTACTCGGGAGGCTG	27	+	22
t0123260	8	CTGTAGTCCCAGCTACTCGGGAGGCTGA	28	+	22
t0189944	5	CTGTAGTCCCAGCTACTCGGG	21	+	22
t0314757	3	CTGTAGTCCCAGCTACTCGGGAGGCTGAG	29	+	22
t0400268	2	CTGTAGTCCCAGCTACTCGGGAGG	24	+	22
t0720861	1	CTGTAGTCCCAGCTACTCGGGAG	23	+	22
t0012807	103	TGTAGTCCCAGCTACTCGGGAGGCTG	26	+	23
t0159716	6	TGTAGTCCCAGCTACTCGGGAGGCTGA	27	+	23
t0370267	2	TGTAGTCCCAGCTACTCGGGA	21	+	23
t0490663	2	TGTAGTCCCAGCTACTCGGG	20	+	23
t0514004	2	TGTAGTCCCAGCTACTCGGGAGG	23	+	23
t1294945	1	TGTAGTCCCAGCTACTCGG	19	+	23
t1591668	1	TGTAGTCCCAGCTACTCGGGAGGCTGAG	28	+	23
t0870208	1	GTAGTCCCAGCTACTCGGGAGGC	23	+	24
t1234271	1	GTAGTCCCAGCTACTCGGGAGGCTG	25	+	24
t1304798	1	CCCAGCTACTCGGGAGGCTGAGG	23	+	29
t1693296	1	CCCAGCTACTCGGGAGGCTGAG	22	+	29
t1095243	1	CAGCTACTCGGGAGGCTGAGG	21	+	31
t0138240	7	AGCTACTCGGGAGGCTGAGG	20	+	32
t0422976	2	AGCTACTCGGGAGGCTGAGGCTGGAG	26	+	32
t1021615	1	AGCTACTCGGGAGGCTGAG	19	+	32
t1027452	1	AGCTACTCGGGAGGCTGAGGC	21	+	32
t1660213	1	AGCTACTCGGGAGGCTGAGGCTGGAGG	27	+	32
t0117844	9	GCTACTCGGGAGGCTGAGGCTGGAG	25	+	33
t0167251	6	GCTACTCGGGAGGCTGAGG	19	+	33
t0189396	5	GCTACTCGGGAGGCTGAGGCTGG	23	+	33
t0477264	2	GCTACTCGGGAGGCTGAGGCTGGAGG	26	+	33
t0509157	2	GCTACTCGGGAGGCTGAGGC	20	+	33
t1010761	1	GCTACTCGGGAGGCTGAGGCTGGAGGATC	29	+	33
t1296038	1	GCTACTCGGGAGGCTGAGGCTGGA	24	+	33
t0179583	5	CTACTCGGGAGGCTGAGGCTGGAG	24	+	34
t0194315	5	CTACTCGGGAGGCTGAGGCTGGAGG	25	+	34
t0358229	2	CTACTCGGGAGGCTGAGGCTGGAGGATCG	29	+	34
t0485728	2	CTACTCGGGAGGCTGAGGCTGG	22	+	34
t1588472	1	CTACTCGGGAGGCTGAGGCTGGAGGA	26	+	34
t1632153	1	CTACTCGGGAGGCTGAGG	18	+	34
t1226122	1	TACTCGGGAGGCTGAGGCTGGA	22	+	35
t1367540	1	TACTCGGGAGGCTGAGGCTGGAG	23	+	35
t0174588	5	ACTCGGGAGGCTGAGGCTGGAG	22	+	36
t0407510	2	ACTCGGGAGGCTGAGGCTGGAGG	23	+	36
t0700780	1	ACTCGGGAGGCTGAGGCTGGAGGATC	26	+	36
t1273604	1	ACTCGGGAGGCTGAGGCTGGAGGATCG	27	+	36
t0069438	16	CTCGGGAGGCTGAGGCTGGAGGATCG	26	+	37
t0117568	9	CTCGGGAGGCTGAGGCTGGAG	21	+	37
t0126372	8	CTCGGGAGGCTGAGGCTGGAGG	22	+	37
t0146233	7	CTCGGGAGGCTGAGGCTGGAGGATCGCT	28	+	37
t0166542	6	CTCGGGAGGCTGAGGCTGGAGGATCGCTT	29	+	37
t0218847	4	CTCGGGAGGCTGAGGCTGGAGGATC	25	+	37
t0219299	4	CTCGGGAGGCTGAGGCTGGAGGA	23	+	37
t0388896	2	CTCGGGAGGCTGAGGCTGGAGGATCGCTTG	30	+	37
t0972572	1	CTCGGGAGGCTGAGGCTGGA	20	+	37
t0577554	1	TCGGGAGGCTGAGGCTGGAG	20	+	38
t0733243	1	TCGGGAGGCTGAGGCTGGAGGATCG	25	+	38
t0823306	1	TCGGGAGGCTGAGGCTGGAGGAT	23	+	38
t0872684	1	TCGGGAGGCTGAGGCTGGAGG	21	+	38
t0432878	2	CGGGAGGCTGAGGCTGGAGGATCGC	25	+	39
t0485283	2	CGGGAGGCTGAGGCTGGAGGAT	22	+	39
t0887396	1	CGGGAGGCTGAGGCTGGAG	19	+	39
t1052653	1	CGGGAGGCTGAGGCTGGAGGATCGCT	26	+	39
t1293676	1	CGGGAGGCTGAGGCTGGAGG	20	+	39
t0176313	5	GGGAGGCTGAGGCTGGAGGATCGCTT	26	+	40
t0184495	5	GGGAGGCTGAGGCTGGAGG	19	+	40
t0193104	5	GGGAGGCTGAGGCTGGAGGATCG	23	+	40
t0335790	2	GGGAGGCTGAGGCTGGAGGATCGCT	25	+	40
t0387412	2	GGGAGGCTGAGGCTGGAGGA	20	+	40
t0434106	2	GGGAGGCTGAGGCTGGAGGATC	22	+	40
t0467791	2	GGGAGGCTGAGGCTGGAGGAT	21	+	40
t0681805	1	GGGAGGCTGAGGCTGGAGGATCGCTTG	27	+	40
t0856069	1	GGGAGGCTGAGGCTGGAGGATCGCTTGA	28	+	40
t1131931	1	GGGAGGCTGAGGCTGGAGGATCGC	24	+	40
t0327992	3	GGAGGCTGAGGCTGGAGGATC	21	+	41
t0354739	2	GGAGGCTGAGGCTGGAGGATCGCT	24	+	41
t0524122	2	GGAGGCTGAGGCTGGAGGATCGCTT	25	+	41
t0705400	1	GGAGGCTGAGGCTGGAGGAT	20	+	41
t1275898	1	GGAGGCTGAGGCTGGAGGATCGCTTGA	27	+	41
t0898372	1	GAGGCTGAGGCTGGAGGATCGCTT	24	+	42
t1388756	1	GAGGCTGAGGCTGGAGGA	18	+	42
t1565507	1	GAGGCTGAGGCTGGAGGATCG	21	+	42
t0007516	175	AGGCTGAGGCTGGAGGATCGCT	22	+	43
t0030006	42	AGGCTGAGGCTGGAGGATCGCTT	23	+	43
t0041917	29	AGGCTGAGGCTGGAGGATCGC	21	+	43
t0092824	12	AGGCTGAGGCTGGAGGATCG	20	+	43
t0104676	10	AGGCTGAGGCTGGAGGATC	19	+	43
t0179367	5	AGGCTGAGGCTGGAGGATCGCTTGA	25	+	43
t0211967	4	AGGCTGAGGCTGGAGGATCGCTTGAGTCC	29	+	43
t0213812	4	AGGCTGAGGCTGGAGGAT	18	+	43
t0222904	4	AGGCTGAGGCTGGAGGATCGCTTG	24	+	43
t1087794	1	AGGCTGAGGCTGGAGGATCGCTTGAG	26	+	43
t0025287	50	GGCTGAGGCTGGAGGATCGCT	21	+	44
t0082492	13	GGCTGAGGCTGGAGGATCGCTT	22	+	44
t0100716	10	GGCTGAGGCTGGAGGATCG	19	+	44
t0108607	10	GGCTGAGGCTGGAGGATCGC	20	+	44
t0117592	9	GGCTGAGGCTGGAGGATCGCTTGAGTCC	28	+	44
t0290860	3	GGCTGAGGCTGGAGGATCGCTTGA	24	+	44
t0420051	2	GGCTGAGGCTGGAGGATCGCTTG	23	+	44
t0518234	2	GGCTGAGGCTGGAGGATCGCTTGAGTC	27	+	44
t0728274	1	GGCTGAGGCTGGAGGATCGCTTGAGTCCAG	30	+	44
t1094016	1	GGCTGAGGCTGGAGGATCGCTTGAG	25	+	44
t1707170	1	GGCTGAGGCTGGAGGATC	18	+	44
t0089837	12	GCTGAGGCTGGAGGATCGCT	20	+	45
t0094640	11	GCTGAGGCTGGAGGATCGCTTGA	23	+	45
t0103350	10	GCTGAGGCTGGAGGATCGCTTGAGTCC	27	+	45
t0192284	5	GCTGAGGCTGGAGGATCGC	19	+	45
t0454501	2	GCTGAGGCTGGAGGATCGCTTG	22	+	45
t0500431	2	GCTGAGGCTGGAGGATCGCTT	21	+	45
t0516083	2	GCTGAGGCTGGAGGATCGCTTGAGTC	26	+	45
t0846561	1	GCTGAGGCTGGAGGATCG	18	+	45
t1488433	1	GCTGAGGCTGGAGGATCGCTTGAG	24	+	45
t0152682	6	CTGAGGCTGGAGGATCGCTTGAGTCC	26	+	46
t0239454	4	CTGAGGCTGGAGGATCGCTTGA	22	+	46
t0269867	3	CTGAGGCTGGAGGATCGCTTG	21	+	46
t0355898	2	CTGAGGCTGGAGGATCGCTT	20	+	46
t0558598	1	CTGAGGCTGGAGGATCGCTTGAGTCCA	27	+	46
t0648463	1	CTGAGGCTGGAGGATCGC	18	+	46
t0974296	1	CTGAGGCTGGAGGATCGCTTGAGT	24	+	46
t0993160	1	CTGAGGCTGGAGGATCGCT	19	+	46
t0194105	5	TGAGGCTGGAGGATCGCTTG	20	+	47
t0321753	3	TGAGGCTGGAGGATCGCTTGA	21	+	47
t1613163	1	TGAGGCTGGAGGATCGCTTGAGTC	24	+	47
t0254159	3	GAGGCTGGAGGATCGCTTGAG	21	+	48
t0325212	3	GAGGCTGGAGGATCGCTTGA	20	+	48
t0325970	3	GAGGCTGGAGGATCGCTTG	19	+	48
t0510821	2	GAGGCTGGAGGATCGCTTGAGTCCA	25	+	48
t0523688	2	GAGGCTGGAGGATCGCTTGAGTCC	24	+	48
t0008347	158	AGGCTGGAGGATCGCTTGAGTCC	23	+	49
t0025010	51	AGGCTGGAGGATCGCTTG	18	+	49
t0025288	50	AGGCTGGAGGATCGCTTGA	19	+	49
t0042266	29	AGGCTGGAGGATCGCTTGAGTCCAGG	26	+	49
t0069160	16	AGGCTGGAGGATCGCTTGAGTC	22	+	49
t0080273	14	AGGCTGGAGGATCGCTTGAG	20	+	49
t0143884	7	AGGCTGGAGGATCGCTTGAGT	21	+	49
t0156131	6	AGGCTGGAGGATCGCTTGAGTCCA	24	+	49
t0168698	6	AGGCTGGAGGATCGCTTGAGTCCAG	25	+	49
t0275102	3	GGCTGGAGGATCGCTTGAGTCC	22	+	50
t0610791	1	GGCTGGAGGATCGCTTGAGTCCAGGAGT	28	+	50
t0707104	1	GGCTGGAGGATCGCTTGAGTC	21	+	50
t1120190	1	GGCTGGAGGATCGCTTGA	18	+	50
t0639439	1	GCTGGAGGATCGCTTGAGTCC	21	+	51
t0933308	1	GCTGGAGGATCGCTTGAGTCCAG	23	+	51
t1004265	1	GCTGGAGGATCGCTTGAGTCCAGG	24	+	51
t1265792	1	GCTGGAGGATCGCTTGAGTC	20	+	51
t1276242	1	GCTGGAGGATCGCTTGAG	18	+	51
t0082676	13	CTGGAGGATCGCTTGAGTCCAGG	23	+	52
t0485167	2	CTGGAGGATCGCTTGAGTCCAGGA	24	+	52
t0833500	1	CTGGAGGATCGCTTGAGT	18	+	52
t0785278	1	TGGAGGATCGCTTGAGTCCAGG	22	+	53
t1027736	1	TGGAGGATCGCTTGAGTCCAG	21	+	53
t0504793	2	GGAGGATCGCTTGAGTCCAGG	21	+	54
t0093581	11	GAGGATCGCTTGAGTCCAGG	20	+	55
t0623255	1	CGCTTGAGTCCAGGAGTTC	19	+	61
t1155857	1	CGCTTGAGTCCAGGAGTTCTG	21	+	61
t0489576	2	TGAGTCCAGGAGTTCTGGGCTGTAGTGCGC	30	+	65
t1072759	1	TGAGTCCAGGAGTTCTGGGCTGTAGTGCG	29	+	65
t0220946	4	GAGTCCAGGAGTTCTGGGCTGTAGTG	26	+	66
t0497400	2	GAGTCCAGGAGTTCTGGGCTGTAGTGCGC	29	+	66
t0508138	2	GAGTCCAGGAGTTCTGGGCTGTAGTGCGCT	30	+	66
t0688584	1	AGTCCAGGAGTTCTGGGCTGTAGTGCGCTA	30	+	67
t0443569	2	CCAGGAGTTCTGGGCTGTAGTG	22	+	70
t0254116	3	CAGGAGTTCTGGGCTGTAGTG	21	+	71
t0275269	3	CAGGAGTTCTGGGCTGTAG	19	+	71
t0326332	3	CAGGAGTTCTGGGCTGTA	18	+	71
t0606675	1	CAGGAGTTCTGGGCTGTAGT	20	+	71
t0979103	1	CAGGAGTTCTGGGCTGTAGTGCG	23	+	71
t1097942	1	CAGGAGTTCTGGGCTGTAGTGCGCTA	26	+	71
t1429395	1	CAGGAGTTCTGGGCTGTAGTGCGCTATG	28	+	71
t1681251	1	CAGGAGTTCTGGGCTGTAGTGCGCTAT	27	+	71
t0000865	1406	AGGAGTTCTGGGCTGTAGTGCGCTA	25	+	72
t0002296	558	AGGAGTTCTGGGCTGTAGTGCGCT	24	+	72
t0003414	379	AGGAGTTCTGGGCTGTAGTG	20	+	72
t0004214	307	AGGAGTTCTGGGCTGTAGTGCGCTATG	27	+	72
t0013956	94	AGGAGTTCTGGGCTGTAGTGCG	22	+	72
t0021479	60	AGGAGTTCTGGGCTGTAG	18	+	72
t0024077	53	AGGAGTTCTGGGCTGTAGTGCGCTAT	26	+	72
t0044873	27	AGGAGTTCTGGGCTGTAGTGCGC	23	+	72
t0066874	17	AGGAGTTCTGGGCTGTAGT	19	+	72
t0095093	11	AGGAGTTCTGGGCTGTAGTGC	21	+	72
t0158121	6	AGGAGTTCTGGGCTGTAGTGCGCTATGCCG	30	+	72
t0298195	3	AGGAGTTCTGGGCTGTAGTGCGCTATGC	28	+	72
t0000399	3094	GGAGTTCTGGGCTGTAGTGCGCTA	24	+	73
t0000837	1461	GGAGTTCTGGGCTGTAGTG	19	+	73
t0000942	1282	GGAGTTCTGGGCTGTAGTGCGCT	23	+	73
t0001089	1124	GGAGTTCTGGGCTGTAGTGCGCTATG	26	+	73
t0006923	191	GGAGTTCTGGGCTGTAGTGCG	21	+	73
t0015647	84	GGAGTTCTGGGCTGTAGTGCGCTAT	25	+	73
t0025728	50	GGAGTTCTGGGCTGTAGTGCGC	22	+	73
t0026629	48	GGAGTTCTGGGCTGTAGTGCGCTATGC	27	+	73
t0040135	30	GGAGTTCTGGGCTGTAGT	18	+	73
t0072116	15	GGAGTTCTGGGCTGTAGTGC	20	+	73
t0143905	7	GGAGTTCTGGGCTGTAGTGCGCTATGCCG	29	+	73
t0476761	2	GGAGTTCTGGGCTGTAGTGCGCTATGCC	28	+	73
t0540159	1	GGAGTTCTGGGCTGTAGTGCGCTATGCCGA	30	+	73
t0000026	51076	GAGTTCTGGGCTGTAGTGCGCTA	23	+	74
t0000082	14815	GAGTTCTGGGCTGTAGTGCGCT	22	+	74
t0000092	12816	GAGTTCTGGGCTGTAGTGCGCTATG	25	+	74
t0000148	8171	GAGTTCTGGGCTGTAGTG	18	+	74
t0000729	1658	GAGTTCTGGGCTGTAGTGCGCTAT	24	+	74
t0001842	682	GAGTTCTGGGCTGTAGTGCG	20	+	74
t0003096	414	GAGTTCTGGGCTGTAGTGCGC	21	+	74
t0027637	46	GAGTTCTGGGCTGTAGTGC	19	+	74
t0033842	37	GAGTTCTGGGCTGTAGTGCGCTATGC	26	+	74
t0061317	19	GAGTTCTGGGCTGTAGTGCGCTATGCCG	28	+	74
t0148899	7	GAGTTCTGGGCTGTAGTGCGCTATGCC	27	+	74
t0180313	5	GAGTTCTGGGCTGTAGTGCGCTATGCCGA	29	+	74
t0582547	1	GAGTTCTGGGCTGTAGTGCGCTATGCCGAT	30	+	74
t0000141	8634	AGTTCTGGGCTGTAGTGCGCTATG	24	+	75
t0000194	6704	AGTTCTGGGCTGTAGTGCGCTA	22	+	75
t0000361	3445	AGTTCTGGGCTGTAGTGCGCT	21	+	75
t0001915	665	AGTTCTGGGCTGTAGTGCGC	20	+	75
t0003365	384	AGTTCTGGGCTGTAGTGCG	19	+	75
t0008595	153	AGTTCTGGGCTGTAGTGCGCTAT	23	+	75
t0021211	61	AGTTCTGGGCTGTAGTGC	18	+	75
t0030586	41	AGTTCTGGGCTGTAGTGCGCTATGC	25	+	75
t0152620	6	AGTTCTGGGCTGTAGTGCGCTATGCCG	27	+	75
t0243631	4	AGTTCTGGGCTGTAGTGCGCTATGCCGA	28	+	75
t0794871	1	AGTTCTGGGCTGTAGTGCGCTATGCC	26	+	75
t1117874	1	AGTTCTGGGCTGTAGTGCGCTATGCCGATC	30	+	75
t1398976	1	AGTTCTGGGCTGTAGTGCGCTATGCCGAT	29	+	75
t0009087	145	GTTCTGGGCTGTAGTGCGCTA	21	+	76
t0016104	81	GTTCTGGGCTGTAGTGCGCT	20	+	76
t0021838	59	GTTCTGGGCTGTAGTGCGCTATG	23	+	76
t0045708	26	GTTCTGGGCTGTAGTGCGC	19	+	76
t0088488	12	GTTCTGGGCTGTAGTGCG	18	+	76
t0169697	6	GTTCTGGGCTGTAGTGCGCTAT	22	+	76
t0018907	69	TTCTGGGCTGTAGTGCGCTATG	22	+	77
t0021655	60	TTCTGGGCTGTAGTGCGCTA	20	+	77
t0034301	36	TTCTGGGCTGTAGTGCGCT	19	+	77
t0146295	7	TTCTGGGCTGTAGTGCGCTAT	21	+	77
t0210558	4	TTCTGGGCTGTAGTGCGC	18	+	77
t0243048	4	TTCTGGGCTGTAGTGCGCTATGC	23	+	77
t0089698	12	TCTGGGCTGTAGTGCGCTATG	21	+	78
t0189719	5	TCTGGGCTGTAGTGCGCTA	19	+	78
t0465466	2	TCTGGGCTGTAGTGCGCT	18	+	78
t1428362	1	TCTGGGCTGTAGTGCGCTAT	20	+	78
t1699024	1	TCTGGGCTGTAGTGCGCTATGC	22	+	78
t0209042	4	CTGGGCTGTAGTGCGCTATG	20	+	79
t0302181	3	CTGGGCTGTAGTGCGCTA	18	+	79
t0426619	2	CTGGGCTGTAGTGCGCTATGC	21	+	79
t0147344	7	TGGGCTGTAGTGCGCTATG	19	+	80
t0461641	2	TGGGCTGTAGTGCGCTATGC	20	+	80
t0301679	3	GGGCTGTAGTGCGCTATGCCGATCGG	26	+	81
t0858967	1	GGGCTGTAGTGCGCTATGCCGATCGGG	27	+	81
t1342872	1	TGTAGTGCGCTATGCCGATCGGGTG	25	+	85
t0816373	1	GTAGTGCGCTATGCCGATCGGGTGTC	26	+	86
t1243849	1	AGTGCGCTATGCCGATCGG	19	+	88
t0741046	1	GTGCGCTATGCCGATCGGG	19	+	89
t1034814	1	GTGCGCTATGCCGATCGGGTG	21	+	89
t1462003	1	GTGCGCTATGCCGATCGGGTGT	22	+	89
t0652843	1	TGCGCTATGCCGATCGGGTG	20	+	90
t1550675	1	TGCGCTATGCCGATCGGGTGT	21	+	90
t0151224	6	CGCTATGCCGATCGGGTGTCCG	22	+	92
t0190699	5	CGCTATGCCGATCGGGTGTCCGC	23	+	92
t0211939	4	CGCTATGCCGATCGGGTGT	19	+	92
t0577577	1	CGCTATGCCGATCGGGTGTCCGCA	24	+	92
t0430464	2	CTATGCCGATCGGGTGTCCGCACTA	25	+	94
t0445203	2	CTATGCCGATCGGGTGTCCG	20	+	94
t0470619	2	CTATGCCGATCGGGTGTCCGC	21	+	94
t0972669	1	CTATGCCGATCGGGTGTCC	19	+	94
t0552650	1	TATGCCGATCGGGTGTCCGCA	21	+	95
t1344260	1	TATGCCGATCGGGTGTCCGC	20	+	95
t0026426	48	ATGCCGATCGGGTGTCCGC	19	+	96
t0314534	3	ATGCCGATCGGGTGTCCGCA	20	+	96
t0700375	1	ATGCCGATCGGGTGTCCGCACTA	23	+	96
t0936624	1	ATGCCGATCGGGTGTCCG	18	+	96
t1386995	1	ATGCCGATCGGGTGTCCGCAC	21	+	96
t0229315	4	TGCCGATCGGGTGTCCGC	18	+	97
t0281095	3	TGCCGATCGGGTGTCCGCACTAAGTTCGGC	30	+	97
t0323034	3	TGCCGATCGGGTGTCCGCACTAAGTTCG	28	+	97
t0617391	1	TGCCGATCGGGTGTCCGCACT	21	+	97
t0946225	1	TGCCGATCGGGTGTCCGCAC	20	+	97
t0988439	1	TGCCGATCGGGTGTCCGCACTAAGTT	26	+	97
t1059303	1	TGCCGATCGGGTGTCCGCACTA	22	+	97
t1339024	1	TGCCGATCGGGTGTCCGCACTAAG	24	+	97
t1660773	1	TGCCGATCGGGTGTCCGCA	19	+	97
t0734144	1	GCCGATCGGGTGTCCGCACTAAGT	24	+	98
t1508646	1	GCCGATCGGGTGTCCGCACTAAGTTCGGC	29	+	98
t0148814	7	CCGATCGGGTGTCCGCACTAAGTTCGGC	28	+	99
t0265506	3	CCGATCGGGTGTCCGCACTA	20	+	99
t0605479	1	CCGATCGGGTGTCCGCACTAAG	22	+	99
t0731345	1	CCGATCGGGTGTCCGCACTAAGTTCGGCA	29	+	99
t0946503	1	CCGATCGGGTGTCCGCACTAAGTTCG	26	+	99
t1128804	1	CCGATCGGGTGTCCGCACTAAGTTCGG	27	+	99
t0265691	3	CGATCGGGTGTCCGCACTAAGTTCGGC	27	+	100
t0504228	2	CGATCGGGTGTCCGCACTAAGTTCGGCAT	29	+	100
t0721263	1	CGATCGGGTGTCCGCACTAAGT	22	+	100
t0381230	2	GATCGGGTGTCCGCACTAAGTTCGGCA	27	+	101
t0308763	3	ATCGGGTGTCCGCACTAAGTTCGGCAT	27	+	102
t1096608	1	ATCGGGTGTCCGCACTAAGTTCGGCA	26	+	102
t1442155	1	ATCGGGTGTCCGCACTAAGTTCG	23	+	102
t0807521	1	TCGGGTGTCCGCACTAAGTTC	21	+	103
t1257206	1	CGGGTGTCCGCACTAAGTTCGGCAT	25	+	104
t0421833	2	GGTGTCCGCACTAAGTTCGG	20	+	106
t0135181	7	CACTAAGTTCGGCATCAATATGG	23	+	114
t0227010	4	CACTAAGTTCGGCATCAATA	20	+	114
t0252583	3	CACTAAGTTCGGCATCAATAT	21	+	114
t0273521	3	CACTAAGTTCGGCATCAATATGGT	24	+	114
t0522372	2	CACTAAGTTCGGCATCAAT	19	+	114
t1017308	1	CACTAAGTTCGGCATCAA	18	+	114
t0387898	2	ACTAAGTTCGGCATCAATATG	21	+	115
t1114466	1	ACTAAGTTCGGCATCAATATGG	22	+	115
t1437984	1	ACTAAGTTCGGCATCAAT	18	+	115
t0406831	2	CTAAGTTCGGCATCAATA	18	+	116
t1491957	1	CTAAGTTCGGCATCAATATGGT	22	+	116
t1496056	1	CTAAGTTCGGCATCAATATGGTGA	24	+	116
t0302530	3	TAAGTTCGGCATCAATATGG	20	+	117
t0713796	1	TAAGTTCGGCATCAATAT	18	+	117
t1602210	1	TAAGTTCGGCATCAATATGGTG	22	+	117
t1622862	1	TAAGTTCGGCATCAATATGGTGA	23	+	117
t0414463	2	AAGTTCGGCATCAATATGGTG	21	+	118
t1313928	1	AAGTTCGGCATCAATATGG	19	+	118
t0363976	2	AGTTCGGCATCAATATGGTG	20	+	119
t1238862	1	ATCAATATGGTGACCTCCCGGGAGCGG	27	+	127
t0610592	1	TCAATATGGTGACCTCCCGGGAGCGG	26	+	128
t0277864	3	CAATATGGTGACCTCCCGGGAGCGGG	26	+	129
t0520399	2	CAATATGGTGACCTCCCGGGAGCGG	25	+	129
t0190713	5	AATATGGTGACCTCCCGGGAGCGG	24	+	130
t0267554	3	AATATGGTGACCTCCCGGGAGCGGG	25	+	130
t1633913	1	AATATGGTGACCTCCCGGGAGCG	23	+	130
t0511968	2	ATATGGTGACCTCCCGGGAGCGG	23	+	131
t0804092	1	ATATGGTGACCTCCCGGGAGCGGG	24	+	131
t0381389	2	TATGGTGACCTCCCGGGAGCGGG	23	+	132
t0747783	1	TATGGTGACCTCCCGGGAGCGG	22	+	132
t1260912	1	TATGGTGACCTCCCGGGAGCGGGG	24	+	132
t1051054	1	ATGGTGACCTCCCGGGAGCGG	21	+	133
t0940417	1	TGGTGACCTCCCGGGAGCGGGG	22	+	134
t0179023	5	GGTGACCTCCCGGGAGCGG	19	+	135
t1195481	1	GGTGACCTCCCGGGAGCG	18	+	135
t1602131	1	GGTGACCTCCCGGGAGCGGGG	21	+	135
t0501082	2	GTGACCTCCCGGGAGCGGG	19	+	136
t0992003	1	GTGACCTCCCGGGAGCGG	18	+	136
t0669732	1	CTCCCGGGAGCGGGGGACCACCAGG	25	+	141
t0836584	1	CTCCCGGGAGCGGGGGACCACCAGGTTGCC	30	+	141
t0187299	5	CCGGGAGCGGGGGACCACCAG	21	+	144
t1583069	1	CCGGGAGCGGGGGACCAC	18	+	144
t0020488	63	CGGGAGCGGGGGACCACCAGGTTG	24	+	145
t0039935	31	CGGGAGCGGGGGACCACCAG	20	+	145
t0063809	18	CGGGAGCGGGGGACCACCAGG	21	+	145
t0213079	4	CGGGAGCGGGGGACCACCA	19	+	145
t0330148	3	CGGGAGCGGGGGACCACC	18	+	145
t0512623	2	CGGGAGCGGGGGACCACCAGGT	22	+	145
t0317403	3	GGGAGCGGGGGACCACCAGGTTG	23	+	146
t0095357	11	GGGACCACCAGGTTGCCTAAGGAGG	25	+	154
t0687616	1	GGGACCACCAGGTTGCCTAAGGAGGGGTG	29	+	154
t0772810	1	GGGACCACCAGGTTGCCTAAGGAG	24	+	154
t1253241	1	CCACCAGGTTGCCTAAGGAGGGGTG	25	+	158
t0861767	1	ACCAGGTTGCCTAAGGAGGGGT	22	+	160
t1592464	1	CCAGGTTGCCTAAGGAGGGGTGAACCGG	28	+	161
t0246341	4	CAGGTTGCCTAAGGAGGGGTGAACCGGC	28	+	162
t0617003	1	AGGTTGCCTAAGGAGGGGTGAACCGGCCC	29	+	163
t1179715	1	AGGTTGCCTAAGGAGGGGTGAACCGGC	27	+	163
t1370908	1	AGGTTGCCTAAGGAGGGGTGAACCGG	26	+	163
t0542699	1	GGTTGCCTAAGGAGGGGTGA	20	+	164
t0511732	2	GTTGCCTAAGGAGGGGTGAACCGGCCC	27	+	165
t0524833	2	GTTGCCTAAGGAGGGGTGAACCGG	24	+	165
t0858883	1	GTTGCCTAAGGAGGGGTGAACC	22	+	165
t1250852	1	GTTGCCTAAGGAGGGGTGAAC	21	+	165
t0376453	2	TGCCTAAGGAGGGGTGAACCGG	22	+	167
t1628512	1	TGCCTAAGGAGGGGTGAACCGGCC	24	+	167
t0141325	7	GCCTAAGGAGGGGTGAACCGG	21	+	168
t0557371	1	GCCTAAGGAGGGGTGAACCGGC	22	+	168
t0731687	1	GCCTAAGGAGGGGTGAACCGGCCCAG	26	+	168
t1017332	1	GCCTAAGGAGGGGTGAACCGGCC	23	+	168
t1308001	1	GCCTAAGGAGGGGTGAACCG	20	+	168
t0019414	67	CCTAAGGAGGGGTGAACCGG	20	+	169
t0043748	28	CCTAAGGAGGGGTGAACCGGC	21	+	169
t0070375	16	CCTAAGGAGGGGTGAACCG	19	+	169
t0110646	9	CCTAAGGAGGGGTGAACCGGCCCAG	25	+	169
t0178836	5	CCTAAGGAGGGGTGAACCGGCCCAGG	26	+	169
t0352011	2	CCTAAGGAGGGGTGAACCGGCCCA	24	+	169
t0490108	2	CCTAAGGAGGGGTGAACCGGCCC	23	+	169
t1029086	1	CCTAAGGAGGGGTGAACCGGCC	22	+	169
t0095928	11	CTAAGGAGGGGTGAACCGG	19	+	170
t0110469	9	CTAAGGAGGGGTGAACCGGC	20	+	170
t0143712	7	CTAAGGAGGGGTGAACCGGCCCAGGTCG	28	+	170
t0419200	2	CTAAGGAGGGGTGAACCG	18	+	170
t1206067	1	CTAAGGAGGGGTGAACCGGCCCAGGTC	27	+	170
t1678714	1	CTAAGGAGGGGTGAACCGGCCC	22	+	170
t0032268	39	TAAGGAGGGGTGAACCGGCC	20	+	171
t0071622	16	TAAGGAGGGGTGAACCGGCCC	21	+	171
t0073513	15	TAAGGAGGGGTGAACCGGC	19	+	171
t0199172	5	TAAGGAGGGGTGAACCGG	18	+	171
t0384280	2	TAAGGAGGGGTGAACCGGCCCA	22	+	171
t0889120	1	TAAGGAGGGGTGAACCGGCCCAGGTC	26	+	171
t1239213	1	TAAGGAGGGGTGAACCGGCCCAGGTCG	27	+	171
t1515366	1	TAAGGAGGGGTGAACCGGCCCAGGTCGGA	29	+	171
t1526524	1	TAAGGAGGGGTGAACCGGCCCAGG	24	+	171
t0021931	59	AAGGAGGGGTGAACCGGCC	19	+	172
t0028388	44	AAGGAGGGGTGAACCGGCCC	20	+	172
t0043478	28	AAGGAGGGGTGAACCGGC	18	+	172
t0180818	5	AAGGAGGGGTGAACCGGCCCAGG	23	+	172
t0255002	3	AAGGAGGGGTGAACCGGCCCAG	22	+	172
t0280471	3	AAGGAGGGGTGAACCGGCCCAGGTC	25	+	172
t0298267	3	AAGGAGGGGTGAACCGGCCCAGGTCG	26	+	172
t0323618	3	AAGGAGGGGTGAACCGGCCCA	21	+	172
t0788934	1	AAGGAGGGGTGAACCGGCCCAGGT	24	+	172
t0143633	7	AGGAGGGGTGAACCGGCCC	19	+	173
t0224575	4	AGGAGGGGTGAACCGGCCCAGGTCGG	26	+	173
t0240504	4	AGGAGGGGTGAACCGGCC	18	+	173
t0290175	3	AGGAGGGGTGAACCGGCCCAGGTCGGA	27	+	173
t0408550	2	AGGAGGGGTGAACCGGCCCAGGTC	24	+	173
t0540546	1	AGGAGGGGTGAACCGGCCCAG	21	+	173
t1397472	1	AGGAGGGGTGAACCGGCCCAGGT	23	+	173
t1550789	1	AGGAGGGGTGAACCGGCCCAGGTCG	25	+	173
t1685617	1	AGGAGGGGTGAACCGGCCCAGG	22	+	173
t0619807	1	GGAGGGGTGAACCGGCCCAGGTCGGA	26	+	174
t1525422	1	GGAGGGGTGAACCGGCCCAGGTCGG	25	+	174
t1559516	1	GGAGGGGTGAACCGGCCCAGGTCG	24	+	174
t1475694	1	GAGGGGTGAACCGGCCCAGGTCGG	24	+	175
t0290825	3	AGGGGTGAACCGGCCCAGGTCGGA	24	+	176
t0592958	1	AGGGGTGAACCGGCCCAGGTCGGAAACG	28	+	176
t0723399	1	AGGGGTGAACCGGCCCAGGTCG	22	+	176
t1455112	1	AGGGGTGAACCGGCCCAGGTC	21	+	176
t0831605	1	GGGGTGAACCGGCCCAGGTCGG	22	+	177
t0243747	4	GGGTGAACCGGCCCAGGTCGG	21	+	178
t0358085	2	GGGTGAACCGGCCCAGGTCGGA	22	+	178
t1288300	1	GGGTGAACCGGCCCAGGTCG	20	+	178
t0086668	12	TGAACCGGCCCAGGTCGGAAACGGAGCAG	29	+	181
t0166722	6	TGAACCGGCCCAGGTCGGAAACGGAGCAGG	30	+	181
t0234686	4	TGAACCGGCCCAGGTCGGAAACGGAGCA	28	+	181
t0259776	3	TGAACCGGCCCAGGTCGGAAACGGAGC	27	+	181
t0296823	3	TGAACCGGCCCAGGTCGGAAACGGA	25	+	181
t0434509	2	TGAACCGGCCCAGGTCGGAAACGG	24	+	181
t1393165	1	TGAACCGGCCCAGGTCGGAAACGGAG	26	+	181
t0270408	3	GAACCGGCCCAGGTCGGAAACGGAGCAG	28	+	182
t0653913	1	GAACCGGCCCAGGTCGGAAACGGAGCAGG	29	+	182
t0006453	204	AACCGGCCCAGGTCGGAAACGGAGCAGG	28	+	183
t0056150	21	AACCGGCCCAGGTCGGAAACGGAGCAGGTC	30	+	183
t0068168	17	AACCGGCCCAGGTCGGAAACGGAGCAG	27	+	183
t0119165	9	AACCGGCCCAGGTCGGAAACGGAGCAGGT	29	+	183
t0172599	5	AACCGGCCCAGGTCGGAAACGGAGCA	26	+	183
t0443903	2	AACCGGCCCAGGTCGGAAACGGAG	24	+	183
t0521634	2	AACCGGCCCAGGTCGGAAACGGAGC	25	+	183
t1681421	1	AACCGGCCCAGGTCGGAAACGG	22	+	183
t0198789	5	ACCGGCCCAGGTCGGAAACGGAGCAGG	27	+	184
t0906352	1	ACCGGCCCAGGTCGGAAACGGAGCAGGTC	29	+	184
t0486191	2	CCGGCCCAGGTCGGAAACGGAGCAGG	26	+	185
t0667449	1	CCGGCCCAGGTCGGAAACGGAGCA	24	+	185
t1105048	1	CCGGCCCAGGTCGGAAACGGAGCAGGTC	28	+	185
t1569571	1	CCGGCCCAGGTCGGAAACGGAGCAG	25	+	185
t0043164	28	CGGCCCAGGTCGGAAACGGAGCA	23	+	186
t0083948	13	CGGCCCAGGTCGGAAACGGAGCAG	24	+	186
t0157815	6	CGGCCCAGGTCGGAAACGGAGCAGG	25	+	186
t0217299	4	CGGCCCAGGTCGGAAACGGAG	21	+	186
t0262095	3	CGGCCCAGGTCGGAAACGGAGCAGGT	26	+	186
t0468172	2	CGGCCCAGGTCGGAAACGGAGC	22	+	186
t1127852	1	CGGCCCAGGTCGGAAACGGAGCAGGTC	27	+	186
t0110263	9	GGCCCAGGTCGGAAACGGAGCA	22	+	187
t0301884	3	GGCCCAGGTCGGAAACGGAGCAG	23	+	187
t0305753	3	GGCCCAGGTCGGAAACGGAGCAGG	24	+	187
t0362230	2	GGCCCAGGTCGGAAACGGA	19	+	187
t0384808	2	GGCCCAGGTCGGAAACGGAGCAGGTC	26	+	187
t0516738	2	GGCCCAGGTCGGAAACGGAG	20	+	187
t0877471	1	GGCCCAGGTCGGAAACGG	18	+	187
t0009007	146	GCCCAGGTCGGAAACGGAG	19	+	188
t0011949	111	GCCCAGGTCGGAAACGGAGCAG	22	+	188
t0012012	110	GCCCAGGTCGGAAACGGAGCA	21	+	188
t0012119	109	GCCCAGGTCGGAAACGGAGCAGG	23	+	188
t0018504	71	GCCCAGGTCGGAAACGGAGCAGGTC	25	+	188
t0024783	51	GCCCAGGTCGGAAACGGAGC	20	+	188
t0041739	29	GCCCAGGTCGGAAACGGAGCAGGT	24	+	188
t0049220	24	GCCCAGGTCGGAAACGGA	18	+	188
t0004874	268	CCCAGGTCGGAAACGGAGCA	20	+	189
t0013887	95	CCCAGGTCGGAAACGGAGCAG	21	+	189
t0022165	58	CCCAGGTCGGAAACGGAGCAGG	22	+	189
t0053620	22	CCCAGGTCGGAAACGGAGCAGGTC	24	+	189
t0079378	14	CCCAGGTCGGAAACGGAGCAGGT	23	+	189
t0090508	12	CCCAGGTCGGAAACGGAGC	19	+	189
t0341551	2	CCCAGGTCGGAAACGGAG	18	+	189
t0009094	145	CCAGGTCGGAAACGGAGCA	19	+	190
t0018629	70	CCAGGTCGGAAACGGAGCAG	20	+	190
t0023449	55	CCAGGTCGGAAACGGAGCAGG	21	+	190
t0030828	41	CCAGGTCGGAAACGGAGCAGGTC	23	+	190
t0040462	30	CCAGGTCGGAAACGGAGCAGGT	22	+	190
t0076180	15	CCAGGTCGGAAACGGAGC	18	+	190
t0436118	2	CCAGGTCGGAAACGGAGCAGGTCAA	25	+	190
t0634406	1	CCAGGTCGGAAACGGAGCAGGTCA	24	+	190
t0000830	1470	CAGGTCGGAAACGGAGCA	18	+	191
t0001360	916	CAGGTCGGAAACGGAGCAGG	20	+	191
t0001435	864	CAGGTCGGAAACGGAGCAG	19	+	191
t0003133	409	CAGGTCGGAAACGGAGCAGGTC	22	+	191
t0003315	389	CAGGTCGGAAACGGAGCAGGT	21	+	191
t0014769	89	CAGGTCGGAAACGGAGCAGGTCA	23	+	191
t0105015	10	CAGGTCGGAAACGGAGCAGGTCAA	24	+	191
t0192728	5	CAGGTCGGAAACGGAGCAGGTCAAA	25	+	191
t0472859	2	CAGGTCGGAAACGGAGCAGGTCAAAACTCC	30	+	191
t1031575	1	CAGGTCGGAAACGGAGCAGGTCAAAA	26	+	191
t0001318	939	AGGTCGGAAACGGAGCAGGT	20	+	192
t0002082	615	AGGTCGGAAACGGAGCAGGTC	21	+	192
t0002293	558	AGGTCGGAAACGGAGCAGG	19	+	192
t0004389	296	AGGTCGGAAACGGAGCAG	18	+	192
t0017961	73	AGGTCGGAAACGGAGCAGGTCA	22	+	192
t0066908	17	AGGTCGGAAACGGAGCAGGTCAA	23	+	192
t0116713	9	AGGTCGGAAACGGAGCAGGTCAAAACTCC	29	+	192
t0157341	6	AGGTCGGAAACGGAGCAGGTCAAA	24	+	192
t0157771	6	AGGTCGGAAACGGAGCAGGTCAAAACTC	28	+	192
t0335219	2	AGGTCGGAAACGGAGCAGGTCAAAAC	26	+	192
t0615782	1	AGGTCGGAAACGGAGCAGGTCAAAACT	27	+	192
t1565569	1	AGGTCGGAAACGGAGCAGGTCAAAACTCCC	30	+	192
t0033904	37	GGTCGGAAACGGAGCAGGT	19	+	193
t0044147	27	GGTCGGAAACGGAGCAGG	18	+	193
t0067107	17	GGTCGGAAACGGAGCAGGTC	20	+	193
t0283333	3	GGTCGGAAACGGAGCAGGTCAA	22	+	193
t0002085	615	GTCGGAAACGGAGCAGGTC	19	+	194
t0004654	280	GTCGGAAACGGAGCAGGT	18	+	194
t0017010	77	GTCGGAAACGGAGCAGGTCA	20	+	194
t0024939	51	GTCGGAAACGGAGCAGGTCAAAACTC	26	+	194
t0067556	17	GTCGGAAACGGAGCAGGTCAA	21	+	194
t0189701	5	GTCGGAAACGGAGCAGGTCAAAACTCC	27	+	194
t0293769	3	GTCGGAAACGGAGCAGGTCAAA	22	+	194
t0961958	1	GTCGGAAACGGAGCAGGTCAAAACTCCC	28	+	194
t1534539	1	GTCGGAAACGGAGCAGGTCAAAAC	24	+	194
t0105447	10	TCGGAAACGGAGCAGGTC	18	+	195
t0201216	5	TCGGAAACGGAGCAGGTCA	19	+	195
t0519016	2	TCGGAAACGGAGCAGGTCAAA	21	+	195
t0766158	1	TCGGAAACGGAGCAGGTCAAAAC	23	+	195
t0826416	1	CGGAAACGGAGCAGGTCAAAACT	23	+	196
t1193199	1	CGGAAACGGAGCAGGTCA	18	+	196
t0911376	1	GGAAACGGAGCAGGTCAA	18	+	197
t1049156	1	GGAAACGGAGCAGGTCAAAACT	22	+	197
t1341027	1	GAAACGGAGCAGGTCAAAACT	21	+	198
t1480611	1	GAAACGGAGCAGGTCAAAACTC	22	+	198
t0201994	5	AAACGGAGCAGGTCAAAACTC	21	+	199
t0120731	8	AACGGAGCAGGTCAAAACTC	20	+	200
t0617630	1	AACGGAGCAGGTCAAAACTCC	21	+	200
t0367884	2	ACGGAGCAGGTCAAAACTCCCGTG	24	+	201
t1665735	1	ACGGAGCAGGTCAAAACTC	19	+	201
t0621945	1	CGGAGCAGGTCAAAACTC	18	+	202
t0734883	1	AGCAGGTCAAAACTCCCGTGCTGATC	26	+	205
t0296369	3	CAGGTCAAAACTCCCGTGC	19	+	207
t0332572	2	CAGGTCAAAACTCCCGTG	18	+	207
t0455701	2	CAGGTCAAAACTCCCGTGCTGAT	23	+	207
t0361510	2	GTCAAAACTCCCGTGCTGATC	21	+	210
t0421146	2	GTCAAAACTCCCGTGCTG	18	+	210
t1549061	1	GTCAAAACTCCCGTGCTGA	19	+	210
t0215561	4	TCAAAACTCCCGTGCTGATCAGTAG	25	+	211
t0656770	1	TCAAAACTCCCGTGCTGATCAGTAGTGG	28	+	211
t1061097	1	TCAAAACTCCCGTGCTGATC	20	+	211
t0215632	4	CAAAACTCCCGTGCTGATCAGTAGTGG	27	+	212
t0294931	3	CAAAACTCCCGTGCTGATCAGTAGTGGG	28	+	212
t0312346	3	CAAAACTCCCGTGCTGATCAGTAG	24	+	212
t0370027	2	CAAAACTCCCGTGCTGATC	19	+	212
t1378826	1	CAAAACTCCCGTGCTGATCAG	21	+	212
t0031985	39	AAAACTCCCGTGCTGATCAGTAGTGG	26	+	213
t0051916	23	AAAACTCCCGTGCTGATCAGTAGTGGG	27	+	213
t0053441	22	AAAACTCCCGTGCTGATCAGTAG	23	+	213
t0100285	11	AAAACTCCCGTGCTGATCAGTAGTG	25	+	213
t0166603	6	AAAACTCCCGTGCTGATCAG	20	+	213
t0216356	4	AAAACTCCCGTGCTGATCAGTAGTGGGA	28	+	213
t0312700	3	AAAACTCCCGTGCTGATCAGTAGT	24	+	213
t1046295	1	AAAACTCCCGTGCTGATC	18	+	213
t0060966	19	AAACTCCCGTGCTGATCAGTAGTGG	25	+	214
t0132508	8	AAACTCCCGTGCTGATCAGTAGTGGG	26	+	214
t0137347	7	AAACTCCCGTGCTGATCAG	19	+	214
t0137915	7	AAACTCCCGTGCTGATCAGTAGTG	24	+	214
t0142751	7	AAACTCCCGTGCTGATCAGTAG	22	+	214
t0759326	1	AAACTCCCGTGCTGATCAGTAGT	23	+	214
t0235557	4	AACTCCCGTGCTGATCAGTAG	21	+	215
t0243450	4	AACTCCCGTGCTGATCAGTAGTGG	24	+	215
t0310611	3	AACTCCCGTGCTGATCAGTAGTG	23	+	215
t0482800	2	ACTCCCGTGCTGATCAGTAGTGG	23	+	216
t0749712	1	ACTCCCGTGCTGATCAGTAG	20	+	216
t0509426	2	CTCCCGTGCTGATCAGTAGT	20	+	217
t0732436	1	CTCCCGTGCTGATCAGTAG	19	+	217
t1073820	1	CTCCCGTGCTGATCAGTAGTGG	22	+	217
t1215041	1	CTCCCGTGCTGATCAGTAGTGGG	23	+	217
t0501526	2	TCCCGTGCTGATCAGTAGTGG	21	+	218
t1087013	1	TCCCGTGCTGATCAGTAG	18	+	218
t1426093	1	TCCCGTGCTGATCAGTAGTG	20	+	218
t0207464	4	CCCGTGCTGATCAGTAGTGG	20	+	219
t0446653	2	CCCGTGCTGATCAGTAGTGGG	21	+	219
t0081614	13	CCGTGCTGATCAGTAGTGGG	20	+	220
t0097122	11	CCGTGCTGATCAGTAGTGG	19	+	220
t0201927	5	CCGTGCTGATCAGTAGTGGGA	21	+	220
t0218960	4	CCGTGCTGATCAGTAGTG	18	+	220
t0774170	1	CCGTGCTGATCAGTAGTGGGATC	23	+	220
t0803613	1	CCGTGCTGATCAGTAGTGGGATCGCG	26	+	220
t0022954	56	CGTGCTGATCAGTAGTGG	18	+	221
t0066108	17	CGTGCTGATCAGTAGTGGG	19	+	221
t0325510	3	CGTGCTGATCAGTAGTGGGA	20	+	221
t1660195	1	CGTGCTGATCAGTAGTGGGATCGCG	25	+	221
t0197596	5	GTGCTGATCAGTAGTGGG	18	+	222
t0285838	3	GTGCTGATCAGTAGTGGGA	19	+	222
t1425327	1	GTGCTGATCAGTAGTGGGATCGC	23	+	222
t0162005	6	TGCTGATCAGTAGTGGGA	18	+	223
t0228562	4	TGCTGATCAGTAGTGGGAT	19	+	223
t0336507	2	GCTGATCAGTAGTGGGAT	18	+	224
t1071162	1	GCTGATCAGTAGTGGGATC	19	+	224
t1632778	1	GCTGATCAGTAGTGGGATCGCG	22	+	224
t1623980	1	CTGATCAGTAGTGGGATCGCGC	22	+	225
t0251102	3	ATCAGTAGTGGGATCGCGCCTG	22	+	228
t0337799	2	ATCAGTAGTGGGATCGCGCCT	21	+	228
t0617561	1	ATCAGTAGTGGGATCGCG	18	+	228
t0742936	1	ATCAGTAGTGGGATCGCGC	19	+	228
t1412295	1	ATCAGTAGTGGGATCGCGCC	20	+	228
t0203200	4	TCAGTAGTGGGATCGCGCCTG	21	+	229
t0318831	3	TCAGTAGTGGGATCGCGC	18	+	229
t0346973	2	TCAGTAGTGGGATCGCGCCTGTG	23	+	229
t0134867	7	CAGTAGTGGGATCGCGCCTG	20	+	230
t0300797	3	CAGTAGTGGGATCGCGCCTGTGAATAG	27	+	230
t1205929	1	CAGTAGTGGGATCGCGCCTGTGA	23	+	230
t0278140	3	AGTAGTGGGATCGCGCCTGT	20	+	231
t0308620	3	AGTAGTGGGATCGCGCCTGTGAATAGCC	28	+	231
t0362476	2	AGTAGTGGGATCGCGCCTG	19	+	231
t0923601	1	AGTAGTGGGATCGCGCCTGTGA	22	+	231
t0925679	1	AGTAGTGGGATCGCGCCTGTGAATAG	26	+	231
t1398093	1	AGTAGTGGGATCGCGCCTGTG	21	+	231
t0435829	2	GTAGTGGGATCGCGCCTGTGA	21	+	232
t0781898	1	TAGTGGGATCGCGCCTGTGAATAGCCA	27	+	233
t0819430	1	AGTGGGATCGCGCCTGTGAATAG	23	+	234
t0416314	2	GTGGGATCGCGCCTGTGAATA	21	+	235
t0727845	1	GTGGGATCGCGCCTGTGAATAGCCA	25	+	235
t0731084	1	GTGGGATCGCGCCTGTGAATAGCCACT	27	+	235
t1079931	1	GTGGGATCGCGCCTGTGAAT	20	+	235
t1301556	1	GTGGGATCGCGCCTGTGAATAGCC	24	+	235
t0498724	2	TGGGATCGCGCCTGTGAATAGCC	23	+	236
t1122990	1	TGGGATCGCGCCTGTGAATAGCCACT	26	+	236
t0667814	1	GGGATCGCGCCTGTGAATAGCC	22	+	237
t0479891	2	GGATCGCGCCTGTGAATAGC	20	+	238
t0855184	1	GGATCGCGCCTGTGAATAGCCACTG	25	+	238
t1341732	1	GGATCGCGCCTGTGAATAGCCACTGC	26	+	238
t0234318	4	GATCGCGCCTGTGAATAGCCACTGCA	26	+	239
t0388784	2	GATCGCGCCTGTGAATAGCCACTGCACT	28	+	239
t1060712	1	GATCGCGCCTGTGAATAGCCACT	23	+	239
t1400927	1	GATCGCGCCTGTGAATAGC	19	+	239
t1557462	1	GATCGCGCCTGTGAATAGCCA	21	+	239
t0031365	40	ATCGCGCCTGTGAATAGCCACTG	23	+	240
t0038955	31	ATCGCGCCTGTGAATAGC	18	+	240
t0064411	18	ATCGCGCCTGTGAATAGCC	19	+	240
t0074349	15	ATCGCGCCTGTGAATAGCCACT	22	+	240
t0153458	6	ATCGCGCCTGTGAATAGCCACTGCA	25	+	240
t0196764	5	ATCGCGCCTGTGAATAGCCACTGC	24	+	240
t0206906	4	ATCGCGCCTGTGAATAGCCA	20	+	240
t0247817	4	ATCGCGCCTGTGAATAGCCACTGCACTCC	29	+	240
t0270437	3	ATCGCGCCTGTGAATAGCCACTGCACT	27	+	240
t1278566	1	ATCGCGCCTGTGAATAGCCAC	21	+	240
t1300740	1	ATCGCGCCTGTGAATAGCCACTGCACTC	28	+	240
t0652462	1	TCGCGCCTGTGAATAGCCACTG	22	+	241
t0284013	3	CGCGCCTGTGAATAGCCACTG	21	+	242
t0488772	2	CGCGCCTGTGAATAGCCACT	20	+	242
t0493194	2	CGCGCCTGTGAATAGCCACTGCACTCCAG	29	+	242
t1686954	1	CGCGCCTGTGAATAGCCACTGC	22	+	242
t0227143	4	GCGCCTGTGAATAGCCACTG	20	+	243
t0725391	1	GCGCCTGTGAATAGCCACT	19	+	243
t0962880	1	GCGCCTGTGAATAGCCACTGCACT	24	+	243
t1707723	1	GCGCCTGTGAATAGCCACTGC	21	+	243
t1718095	1	GCGCCTGTGAATAGCCACTGCACTCC	26	+	243
t0304513	3	CGCCTGTGAATAGCCACTGC	20	+	244
t0381994	2	CGCCTGTGAATAGCCACTG	19	+	244
t1037387	1	CGCCTGTGAATAGCCACT	18	+	244
t0689176	1	CCTGTGAATAGCCACTGCACTCCAG	25	+	246
t1216227	1	CTGTGAATAGCCACTGCACTCCAGCC	26	+	247
t0217683	4	TGTGAATAGCCACTGCACTCCAG	23	+	248
t0331253	2	TGTGAATAGCCACTGCACTCC	21	+	248
t0132028	8	TGAATAGCCACTGCACTCCAG	21	+	250
t0228287	4	TGAATAGCCACTGCACTCC	19	+	250
t0239921	4	TGAATAGCCACTGCACTCCAGCC	23	+	250
t0385059	2	TGAATAGCCACTGCACTCCAGC	22	+	250
t0436498	2	TGAATAGCCACTGCACTCCAGCCTGGGC	28	+	250
t0666002	1	TGAATAGCCACTGCACTCCAGCCTGGGCA	29	+	250
t0839368	1	TGAATAGCCACTGCACTCCAGCCTG	25	+	250
t0251989	3	AATAGCCACTGCACTCCAGCC	21	+	252
t0278842	3	AATAGCCACTGCACTCCAG	19	+	252
t1252908	1	ATAGCCACTGCACTCCAGCCTGGGC	25	+	253
t0472020	2	GCCACTGCACTCCAGCCTG	19	-	256
t0978237	1	GCCACTGCACTCCAGCCT	18	-	256
t0256307	3	CCACTGCACTCCAGCCTG	18	-	257
t0414607	2	CCACTGCACTCCAGCCTGGG	20	-	257
t0491267	2	CCACTGCACTCCAGCCTGGGCAA	23	-	257
t0159784	6	CACTGCACTCCAGCCTGGG	19	-	258
t0182767	5	CACTGCACTCCAGCCTGGGCAA	22	-	258
t0348358	2	CACTGCACTCCAGCCTGG	18	-	258
t0598304	1	CACTGCACTCCAGCCTGGGC	20	+	258
t0612911	1	CACTGCACTCCAGCCTGGGCA	21	-	258
t1444872	1	CACTGCACTCCAGCCTGGGCAACA	24	-	258
t0497682	2	CTGCACTCCAGCCTGGGCAA	20	-	260
t1040911	1	CTGCACTCCAGCCTGGGCAAC	21	-	260
t1285598	1	CTGCACTCCAGCCTGGGCAACATAGCG	27	+	260
t0471636	2	GCACTCCAGCCTGGGCAACATAGCG	25	+	262
t1049213	1	GCACTCCAGCCTGGGCAACATAGCGAG	27	+	262
t0186761	5	CACTCCAGCCTGGGCAACATAG	22	+	263
t0504707	2	CACTCCAGCCTGGGCAACATAGC	23	+	263
t0505357	2	CACTCCAGCCTGGGCAACATAGCG	24	+	263
t0943696	1	CACTCCAGCCTGGGCAACATAGCGAGACCC	30	+	263
t0836054	1	ACTCCAGCCTGGGCAACATAGCG	23	+	264
t0179387	5	CTCCAGCCTGGGCAACATAG	20	+	265
t1091209	1	CTCCAGCCTGGGCAACATAGCGAGACCC	28	+	265
t0643092	1	TCCAGCCTGGGCAACATAGCGAG	23	+	266
t1580402	1	TCCAGCCTGGGCAACATAG	19	+	266
t1680931	1	TCCAGCCTGGGCAACATAGCGA	22	+	266
t0297286	3	CCAGCCTGGGCAACATAGCGAG	22	+	267
t0409922	2	CCAGCCTGGGCAACATAGCG	20	+	267
t1331849	1	CCAGCCTGGGCAACATAGCGAGACCCCGT	29	+	267
t1647547	1	CCAGCCTGGGCAACATAGCGAGA	23	+	267
t1258457	1	CAGCCTGGGCAACATAGCGAG	21	+	268
t1450323	1	CAGCCTGGGCAACATAGCGAGACC	24	+	268
t0131285	8	AGCCTGGGCAACATAGCGAGACCC	24	+	269
t0252323	3	AGCCTGGGCAACATAGCGAGACCCCGT	27	+	269
t0370011	2	AGCCTGGGCAACATAGCGAGACCCCGTC	28	+	269
t0939851	1	AGCCTGGGCAACATAGCGAG	20	+	269
t1085025	1	AGCCTGGGCAACATAGCGAGACC	23	+	269
t0168278	6	GCCTGGGCAACATAGCGAGACCCCGT	26	+	270
t0391085	2	GCCTGGGCAACATAGCGAGACCCCG	25	+	270
t0668843	1	GCCTGGGCAACATAGCGAGACCC	23	+	270
t0695140	1	GCCTGGGCAACATAGCGAGACCCCGTC	27	+	270
t0008576	154	CCTGGGCAACATAGCGAGACCC	22	+	271
t0016757	78	CCTGGGCAACATAGCGAGACCCCGTC	26	+	271
t0022829	56	CCTGGGCAACATAGCGAGACCCCGT	25	+	271
t0053593	22	CCTGGGCAACATAGCGAGACC	21	+	271
t0095879	11	CCTGGGCAACATAGCGAG	18	+	271
t0113903	9	CCTGGGCAACATAGCGAGACCCCGTCTC	28	+	271
t0114902	9	CCTGGGCAACATAGCGAGACCCCG	24	+	271
t0136842	7	CCTGGGCAACATAGCGAGAC	20	+	271
t0154731	6	CCTGGGCAACATAGCGAGACCCCGTCT	27	+	271
t0302862	3	CCTGGGCAACATAGCGAGACCCC	23	+	271
t0074497	15	CTGGGCAACATAGCGAGACCC	21	+	272
t0500100	2	CTGGGCAACATAGCGAGACCCCGT	24	+	272
t0796520	1	CTGGGCAACATAGCGAGACCCCGTC	25	+	272
t1645170	1	CTGGGCAACATAGCGAGACCCCGTCTC	27	+	272
t0199520	5	TGGGCAACATAGCGAGACCC	20	+	273
t1278191	1	TGGGCAACATAGCGAGACCCC	21	+	273
t0114673	9	GGCAACATAGCGAGACCCCGT	21	+	275
t0382198	2	GGCAACATAGCGAGACCCCGTC	22	+	275
t1054182	1	GGCAACATAGCGAGACCC	18	+	275
t1602812	1	GGCAACATAGCGAGACCCCG	20	+	275
t0062657	18	GCAACATAGCGAGACCCCGT	20	+	276
t1309845	1	GCAACATAGCGAGACCCCGTC	21	+	276
t0044694	27	CAACATAGCGAGACCCCGT	19	+	277
t0475915	2	CAACATAGCGAGACCCCG	18	+	277
t0130892	8	AACATAGCGAGACCCCGT	18	+	278
t0686363	1	AACATAGCGAGACCCCGTCTC	21	+	278
t0988195	1	AACATAGCGAGACCCCGTC	19	+	278
t1143702	1	AACATAGCGAGACCCCGTCT	20	+	278
total	134136
